# Supplementary material
Source: ML conference proceedings conference paper supplement (https://proceedings.neurips.cc/paper_files/paper/2025/hash/713939ee5a7b14a6fecf69e692ec3799-Abstract.html)
Supplement: Supplementary file 1 [file Greedy_Algorithmic_alignment_final.pdf › Greedy_Algorithmic_alignment_final.pdf]

---

# Geometric Algorithms for Neural Combinatorial Optimization with Constraints

---

Anonymous Author(s)

Affiliation

Address

email

## Abstract

1 Self-Supervised Learning (SSL) for Combinatorial Optimization (CO) is an emerg-  
2 ing paradigm for solving combinatorial problems using neural networks. In this  
3 paper, we address a central challenge of SSL for CO: solving problems with  
4 discrete constraints. We design an end-to-end differentiable framework that en-  
5 ables us to solve discrete constrained optimization problems with neural networks.  
6 Concretely, we leverage algorithmic techniques from the literature on convex ge-  
7 ometry and Carathéodory’s theorem to decompose neural network outputs into  
8 convex combinations of polytope corners that correspond to feasible sets. This  
9 decomposition-based approach enables self-supervised training but also ensures  
10 efficient quality-preserving rounding of the neural net output into feasible solutions.  
11 Extensive experiments in cardinality-constrained optimization show that our ap-  
12 proach can consistently outperform neural baselines. We further demonstrate that  
13 our method generalizes beyond cardinality-constrained problems to a diverse set of  
14 combinatorial optimization tasks, including finding independent sets in graphs, and  
15 solving matroid-constrained problems.

## 16 1 Introduction

17 Combinatorial Optimization (CO) encompasses a broad category of optimization problems where the  
18 objective is to find a configuration of discrete objects that satisfies specific constraints and is optimal  
19 given a prescribed criterion. It has a wide range of real-world applications [64, 58, 30, 6, 93, 74]  
20 while also being of central importance in complexity theory and algorithm design. These problems  
21 are often non-convex, and solving them involves exploring large-scale discrete combinatorial spaces  
22 of configurations. To that end, neural networks have emerged as a powerful tool for designing CO  
23 algorithms as they can learn to exploit patterns in real-world data and discover high-quality solutions  
24 efficiently. A compelling proposal in that direction is self-supervised CO because it eschews the need  
25 to acquire labeled data, which can be computationally expensive for those problems. This usually  
26 involves training a neural network to produce solutions to input instances by minimizing a continuous  
27 proxy for the discrete objective of the problem [34, 83, 1, 35, 89]. While the efficiency and scalability  
28 of this approach are appealing, it also harbors significant challenges.

29 Enforcing constraints on the output of the neural network is one of the primary obstacles. When  
30 training, this is often done by including a weighted term in the loss function that penalizes solutions  
31 that do not comply with the constraints. There are two key considerations when doing this. Having  
32 access to a differentiable function that encodes constraint violation for the discrete problem, and  
33 carefully tuning its contribution to the overall loss. Furthermore, at inference, it is important to  
34 guarantee that the output of the neural network is discrete and it complies with the constraints.  
35 In practice, this is usually achieved with an algorithm that rounds the continuous output of the  
36 neural network to a feasible discrete solution. Such algorithms are often heuristics and treat inference

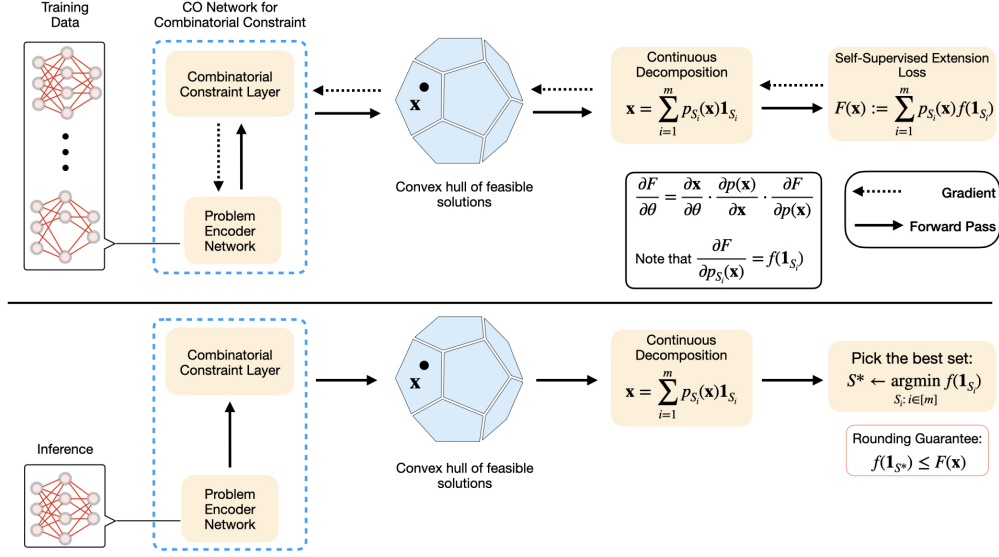

Figure 1: Overview of our framework. During training (top), the model learns to output a point in the convex hull of feasible solutions. A self-supervised extension loss is computed by decomposing this point and evaluating the objective, which is then used to backpropagate. During inference (bottom), the model outputs a relaxed solution, which is decomposed and the best feasible set is selected with a rounding guarantee.

37 differently from training which may hurt performance. Despite recent developments that have enabled  
38 tackling new combinatorial problems in the self-supervised setting, combining loss function design  
39 and rounding in a coherent fashion can still be highly nontrivial.

40 In this work, building on ideas from the literature on self-supervised CO and techniques from  
41 geometric algorithms and combinatorial optimization, we propose an approach to loss function design  
42 that seamlessly integrates training and inference while also providing a rounding guarantee. The  
43 main idea is to *learn to map input instances to distributions of feasible solutions* that maximize  
44 (or minimize resp.) the objective. Given an input instance, we use the neural network to predict a  
45 continuous vector in the convex hull of feasible solutions. Using an iterative algorithm, this vector is  
46 decomposed into a distribution of discrete feasible sets. This algorithm draws from the literature on  
47 Carathéodory’s theorem [12] to express points in the interior of a convex polytope as a sparse convex  
48 combination of the corners of the polytope. This decomposition yields a distribution that allows us to  
49 tractably calculate the expected value of the discrete objective. We use this expectation as our loss  
50 and minimize it with a neural net and standard automatic differentiation in a self-supervised fashion.  
51 By backpropagating derivatives from this expectation, the neural network learns to generate outputs  
52 in the feasible set that optimize the expected objective. At inference time, the iterative algorithm  
53 generates candidate feasible solutions to the problem. The pipeline is summarized in Figure 1.

54 **Our contribution.** Our method generalizes previous work, and offers strong empirical benefits in  
55 efficiency and performance on large-scale CO instances. Our contributions can be summarized as  
56 follows:

- 57 • We use geometric algorithms to design an end-to-end pipeline for constrained neural CO.
- 58 • Our geometric algorithms effectively tackle both the challenge of loss function design for
- 59 training with constraints, and the challenge of rounding neural network outputs at inference.
- 60 • We show strong results in cardinality constrained CO on large-scale instances with hundreds
- 61 of thousands of nodes, often surpassing previous neural baselines and heuristics. We also
- 62 show how the method can be extended to other matroid constraints and independent sets.
- 63 • We conduct ablation studies to test the effectiveness of optimizing the extension with gradient
- 64 descent and the contribution of the model in the performance.

## 65 2 Related work

66 **Self-Supervised CO and continuous extensions.** Our work follows a long line of work on unsu-  
 67 pervised CO [1, 2, 34, 83, 35, 81, 86, 29, 73, 23, 63, 77, 42, 60, 89]. Crucial components of those  
 68 pipelines include the choice of model, the use of specific input features (positional encodings), the loss  
 69 function, and the rounding algorithm. There has been extensive research on neural net architectures  
 70 for combinatorial problems [57, 84, 75, 92] and the role of input features for well known classes of  
 71 models [90, 53, 37]. Our primary focus will be on loss function design and rounding. We build on  
 72 previous work that proposed using continuous extensions of discrete functions as losses for neural  
 73 CO [35]. Following this blueprint, bespoke extensions have been used for learning on permutations  
 74 [62], hierarchical clustering [42] and interpretable graph learning [15]. However, there is no general  
 75 extension design paradigm that can accommodate different constraints. We address this issue by  
 76 proposing a template for extension design and show how it enables building the constraints into the  
 77 distribution. This streamlines the process of building extensions and dispenses with the need to tune  
 78 constraint terms in the loss function that is present in other approaches to self-supervised CO.

79 **Loss function design and enforcing constraints.** The design of specific loss functions in self-  
 80 supervised CO to enable smoother optimization, integration with different powerful architectures,  
 81 and/or better rounding has been studied over the past few years. A common approach is to adopt  
 82 a probabilistic perspective and parametrize a distribution of outputs with a neural network that  
 83 learns to optimize the expected cost and the probability of constraint violation [60, 86, 35, 73, 62].  
 84 Deriving and/or computing those expectations and probability terms for more complex problems can  
 85 be difficult, which motivated the work by [9] that provides derivations and fast rounding techniques  
 86 for cases such as spanning trees and cardinality constraints. In our work, the constraints are built  
 87 into the distribution and the loss only has to handle the objective function. It is challenging to craft  
 88 such losses which has led to the development of techniques that improve training dynamics via  
 89 annealed training [81, 32]. Other approaches to loss function design leverage ideas from physics  
 90 [77, 78], and semidefinite programming [92, 31]. Those cases also involve tunable constraint terms.  
 91 Another major consideration is that of enforcing constraints on the outputs of the neural networks.  
 92 Techniques in the literature typically involve calculating the projection of the neural net output  
 93 onto the feasible set. This has been done for cardinality constraints using ideas from the theory of  
 94 optimal transport [88], and general linear constraints with gradient-based techniques [17, 94]. In the  
 95 continuous (potentially non-convex) optimization setting, several projection techniques have also  
 96 been developed [51, 52, 50, 48].

97 **Convex geometry and learning over polytopes.** Our approach relies on fundamental results from  
 98 convex geometry and geometric algorithms. Specifically, the Carathéodory Theorem states that any  
 99 point in a polytope  $P \subseteq \mathbb{R}^d$  can be expressed as a convex combination of at most  $d + 1$  points. The  
 100 constructive versions of this result [24] have been adapted to yield efficient algorithms in polytopes  
 101 for ranking [41] and scheduling problems [28, 20, 7]. Approximate versions of the decomposition  
 102 have been developed that do not explicitly depend on the ambient dimension  $d$  [3] and admit efficient  
 103 algorithms with fast convergence rates [59, 16]. In the context of machine learning, polyhedral  
 104 methods have been used extensively to impose constraints on the outputs of models for generative  
 105 modelling [21], for learning with end-to-end differentiable sampling from exponential families using  
 106 perturb-and-map techniques [67], for applications to differentiable sorting [5, 72] and learning to  
 107 optimize over permutations [25, 56]. For additional discussion, please refer to the appendix.

## 108 3 Problem formulation and learning setup

109 Let  $V = \{v_1, \dots, v_n\}$  be a set of variables, each assigned a value from a discrete domain  $D =$   
 110  $\{1, \dots, d\}$ . A combinatorial optimization problem consists of a universe of instances  $\mathcal{T}$ , where each  
 111 instance  $T \in \mathcal{T}$  can be represented by a tuple  $T = (V, D, \mathcal{C}, f)$ . The set  $\mathcal{C} \subseteq D^n$  defines the feasible  
 112 solutions to the instance. The real-valued function  $f : D^n \rightarrow \mathbb{R}$  is called the objective function. The  
 113 problem is then to find the optimal feasible vector  $\mathbf{x}^*$ , i.e., to find the feasible vector  $\mathbf{x} \in D^n$  that  
 114 maximizes the objective function  $f$ :

$$\max f(\mathbf{x}), \quad \text{s.t.} \quad \mathbf{x} \in \mathcal{C}. \quad (1)$$

115 In this paper, we focus on CO problems with Boolean domain, i.e.,  $D = \{0, 1\}$ , and  $\mathcal{C} \subseteq \{0, 1\}^n$ .  
 116 This domain choice corresponds to combinatorial optimization problems that involve set functions,

117 i.e.,  $\mathbf{x}$  indicates a subset  $S \subseteq V$  of a ground set  $V = \{v_1, \dots, v_n\}$  of elements and  $x_i = 1$  if element  
 118  $i$  is in the subset, and  $f$  maps each subset to a real number. The subsets can be, for instance, nodes or  
 119 edges in a graph, and are central to many problems in applied mathematics and operations research [8].  
 120 The set  $\mathcal{C} \subseteq \{0, 1\}^n$  includes all subsets of  $V$  that obey the constraints of the problem. Each subset  
 121  $S$  is identified with its indicator vector  $\mathbf{1}_S \in \{0, 1\}^n$  and we use  $f(S)$  and  $f(\mathbf{1}_S)$  interchangeably  
 122 throughout this paper. The objective function is the set function  $f : \{0, 1\}^n \rightarrow \mathbb{R}$ . The goal is to  
 123 select the optimal feasible subset so Equation (1) takes the form  $\max_{S \in \mathcal{C}} f(S)$ .

124 **Self-Supervised CO.** Given a problem instance  $T$  and input features  $\mathbf{Z}_T \in \mathbb{R}^{n \times d}$ , we use a neural  
 125 network  $\text{NN}_\theta$ , which we will often refer to as the encoder network, to map the instance data to an  
 126 output prediction  $\mathbf{x} \in \mathbb{R}^n$  by computing  $\mathbf{x} = \text{NN}_\theta(\mathbf{Z}_T; T)$ . For example, the input instance could  
 127 be a graph, the input features could be positional encodings for the graph, and the neural net a  
 128 Multi-Layer Perceptron (MLP). The output  $\mathbf{x}$  may not correspond to a discrete feasible point. In  
 129 those cases, a rounding algorithm will be used to map  $\mathbf{x}$  to a feasible indicator vector of a set. The  
 130 goal is for the neural net to learn to predict the optimal solution  $\mathbf{x}^*$ . In self-supervised CO, this is  
 131 done by training  $\text{NN}_\theta$  on a collection of instances  $T_1, T_2, \dots, T_m$ . The neural net minimizes the  
 132 problem-specific loss function  $\mathcal{L}_T$  computed for each instance  $\mathcal{L}_T(\text{NN}_\theta(\mathbf{Z}_{T_i}; T_i))$  and averaged over  
 133 a batch (or the entire training set). Since there are no labels, how the loss function is designed to fit  
 134 the constraints of the problem is of critical importance. At inference time, a test instance is processed  
 135 through the neural network to obtain a prediction. At this step, rounding heuristics are typically used  
 136 to ensure that the solution is feasible and discrete. It should be noted that, instead of predicting, it is  
 137 possible to directly optimize the model with gradient descent on the test instances since no labels  
 138 are leveraged during training. In this case, the algorithm incurs the additional computational cost of  
 139 backpropagation which may not be practical in time-critical settings.

## 140 4 Proposed approach

141 First, we present an overview of the key components in the pipeline and then we discuss each  
 142 component in more detail. Our proposed method focuses on the design of  $\mathcal{L}_T(\mathbf{x})$  that is used to train  
 143 the model. The objective  $f$  is a set function with discrete domain and cannot be directly optimized.  
 144 Following the literature, we construct a continuous extension of  $f$ , denoted by  $F(\mathbf{x}) : [0, 1]^n \rightarrow \mathbb{R}$ ,  
 145 and use it as our loss function, i.e.  $\mathcal{L}_T(\mathbf{x}) = F(\mathbf{x})$ . The extension is defined as

$$F(\mathbf{x}) := \mathbb{E}_{S \sim \mathcal{D}_C(\mathbf{x})}[f(S)], \quad (2)$$

146 where  $\mathcal{D}_C(\mathbf{x})$  is a distribution parametrized by the output of the neural network and  $S \in \mathcal{C}$  for all  
 147  $S$  in the support of  $\mathcal{D}_C(\mathbf{x})$ . The key challenge lies in how to tractably construct and parameterize  
 148 such a distribution on feasible sets in a way that enables end-to-end learning. We achieve this using  
 149 an iterative algorithm that ensures  $\mathcal{D}_C(\mathbf{x})$  is supported on  $O(n)$  feasible sets and the probability of  
 150 each set is a differentiable function of  $\mathbf{x}$ . This allows us to efficiently compute the exact expectation  
 151 in Equation (2) and to calculate its derivatives with standard automatic differentiation packages. At  
 152 inference time, the geometric algorithm can be used as a rounding algorithm for  $\mathbf{x}$  since  $\mathcal{D}_C(\mathbf{x})$  has a  
 153 small number of sets in its support. Specifically, we can round  $\mathbf{x}$  to the best set in the support.

### 154 4.1 A general decomposition algorithm for extension design

155 For a feasible set  $\mathcal{C}$ , consider the polytope  $\mathcal{P}(\mathcal{C}) = \text{Conv}(\{\mathbf{1}_S : S \in \mathcal{C}\})$ , i.e., the convex hull of the  
 156 indicator vectors of the sets in  $\mathcal{C}$ . Any point  $\mathbf{x} \in \mathcal{P}(\mathcal{C})$  is a convex combination  $\mathbf{x} = \sum_{S \in \mathcal{C}} \alpha_S \mathbf{1}_S$   
 157 of feasible solutions from  $\mathcal{C}$ . In fact, from Carathéodory's theorem we know that this convex  
 158 combination requires at most  $n + 1$  points where  $n$  is the ambient dimension of the space. The  
 159 coefficients of the convex combination can be viewed as the probabilities of a distribution  $\mathcal{D}_C(\mathbf{x})$   
 160 and hence  $\mathbf{x} = \mathbb{E}_{S \sim \mathcal{D}_C(\mathbf{x})}[\mathbf{1}_S]$ . If we can uniquely and efficiently decompose each point  $\mathbf{x} \in \mathcal{P}(\mathcal{C})$   
 161 into such a convex combination, we can leverage that distribution to compute the extension in  
 162 Equation (2). In Algorithm 1, we propose a general template for an iterative algorithm that yields  
 163 such decompositions and forms the foundation for our approach.

164 Intuitively, the algorithm decomposes  $\mathbf{x}$  iteratively by removing a corner  $\mathbf{1}_S$  weighted by a suitably  
 165 chosen coefficient in each iteration. This is done until the coefficients and the corresponding corners  
 166 can be used to reconstruct  $\mathbf{x}$  up to some small error  $\epsilon$ .

Let  $\mathbf{x} \in \mathcal{P}(\mathcal{C})$  and  $\mathbf{x}_0 = \mathbf{x}$ . In each iteration  $t$ , the algorithm finds a feasible solution in  $\mathcal{C}$  that is both an extremal point of the convex hull and lies in the support of  $\mathbf{x}_t$ . Let this point be  $\mathbf{1}_{S_t} \in \mathcal{C} \subseteq \{0, 1\}^n$ . Let  $a_t \in [0, 1]$  be the coefficient at iteration  $t$ . We express each iterate  $\mathbf{x}_t$  as

$$\mathbf{x}_t = a_t \mathbf{1}_{S_t} + (1 - a_t) \mathbf{x}_{t+1}, \quad (3)$$

where  $a_t$  is a function of  $\mathbf{x}_t$  and is chosen such that  $\mathbf{x}_{t+1}$  remains in  $\mathcal{P}(\mathcal{C})$ . We can recursively apply the same process to  $\mathbf{x}_{t+1}$  until  $\mathbf{x}$  has been decomposed into a convex combination of feasible sets. After the algorithm terminates, for  $a_0 = 0$ , we can obtain a distribution  $\mathcal{D}_{\mathcal{C}}(\mathbf{x})$  which

is completely characterized by the sets  $S_t$  and probabilities  $p_{\mathbf{x}_t}(S_t) = a_t \prod_{i=0}^{t-1} (1 - a_i)$  of the decomposition. Determining the specific form of steps 3 and 4 in a way that yields a polynomial time algorithm is a non-trivial task that depends on the polytope. The following theorem is a constructive version of the Carathéodory theorem, also known in the literature as the GLS Method (from Grötschel-Lovász-Schrijver) [28, 41]. It establishes such a decomposition for a large class of polytopes.

**Theorem 4.1.** (Informal) *There exists polynomial-time algorithm that for any well-described polyhedron  $\mathcal{P}$  given by a strong optimization oracle, for any rational vector  $\mathbf{x}$ , finds vertex-probability pairs  $\{p_{\mathbf{x}_t}(S_t), \mathbf{1}_{S_t}\}$  for  $t = 1, 2, \dots, n$  such that  $\mathbf{x} = \sum_{t=1}^n p_{\mathbf{x}_t}(S_t) \mathbf{1}_{S_t}$ .*

Briefly, the proof proceeds by assuming access to a certain polynomial-time optimization oracle for Step 3 in Algorithm 1. The algorithm leverages the oracle to obtain a vertex for a face of the polytope that contains the current iterate. At step 4,  $a_t$  is chosen so that  $\mathbf{x}_{t+1}$  intersects the boundary of the polytope. In each iteration, the iterate lies on a lower-dimensional face than the previous one, and hence the algorithm terminates in polynomial time, in at most  $n$  iterations [24, Theorem 6.5.11].

**Necessary conditions for end-to-end learning.** Our approach draws insights from this theorem to design a decomposition that can be integrated in gradient-based optimization pipelines. Here, we summarize the basic conditions for the general decomposition to yield an extension that can be optimized with standard automatic differentiation, which will enable end-to-end learning. We require:

1. A differentiable method that ensures our starting point  $\mathbf{x}$  lies in the polytope  $\mathcal{P}(\mathcal{C})$ .
2. A routine that efficiently finds a vertex  $\mathbf{1}_{S_t} \in \mathcal{P}(\mathcal{C})$  in the support of  $\mathbf{x}_t$ .
3. An (almost everywhere) differentiable function  $g(\mathbf{x}_t, S)$  that yields a valid decomposition.

Satisfying these conditions will allow us to tractably construct a distribution of feasible sets  $\mathcal{D}_{\mathcal{C}}(\mathbf{x})$ , which will enable efficient calculation of the expectation in Equation (2). It also means that we can update the parameters of the neural network that is used to predict  $\mathbf{x}$  by optimizing the extension via standard automatic differentiation packages. Each of these steps involves different subtleties depending on the problem. We will show these requirements can be fulfilled for several problems.

**Neural predictions in the feasible set polytope.** Suppose our encoder network outputs  $\mathbf{x} \in \mathbb{R}^n$ . Since Algorithm 1 requires a point in the polytope  $\mathbf{x} \in \mathcal{P}(\mathcal{C})$ , we need a way to enforce this constraint on the output of our neural network. This type of problem has received significant attention (see section 2) in both the optimization and machine learning communities. Commonly, this can involve projection-based techniques such as Sinkhorn’s algorithm [79] and its various extensions [87] or other gradient-based approaches [94]. This can be a viable strategy but, depending on the polytope, may be difficult to integrate in a differentiable pipeline. We will leverage a projection-based approach when appropriate but we also introduce a simple efficient alternative. We interpret the neural encoder output as a perturbation of an interior point in  $\mathcal{P}(\mathcal{C})$ . More concretely, the neural net predicts a perturbation vector  $\mathbf{z} \in \mathbb{R}^n$  such that  $\mathbf{x} = \mathbf{z} + \mathbf{u}$ , where  $\mathbf{u} \in \mathbb{R}^n$  is an interior point of  $\mathcal{P}(\mathcal{C})$ . While this approach circumvents the need for projection, it requires access to an interior point of the polytope. It also requires care so that the perturbed point  $\mathbf{z} + \mathbf{u}$  remains in the polytope. Nonetheless, we show that for several fundamental constraint families—including cardinality constraints, partition matroids, and the spanning tree base polytope—it is possible to do this efficiently in a differentiable way (e.g., Prop. 4.3).

---

#### Algorithm 1 General decomposition algorithm

---

**Require:**  $\mathbf{x} \in [0, 1]^n$  in  $\mathcal{P}(\mathcal{C})$ .

1:  $\mathbf{x}_0 \leftarrow \mathbf{x}$ ,  $a_0 \leftarrow 0$ ,  $t \leftarrow 1$ .

2: **repeat**

3:  $\mathbf{1}_{S_t} \leftarrow$  vertex from  $\mathcal{P}(\mathcal{C})$  in the support of  $\mathbf{x}_t$ .

4:  $a_t \leftarrow g(\mathbf{x}_t, S)$

5:  $\mathbf{x}_{t+1} \leftarrow (\mathbf{x}_t - a_t \mathbf{1}_{S_t}) / (1 - a_t)$

6:  $p_{\mathbf{x}_t}(S_t) \leftarrow a_t \prod_{i=0}^{t-1} (1 - a_i)$

7:  $t \leftarrow t + 1$

8: **until**  $\|\mathbf{x} - \sum_t p_{\mathbf{x}_t}(S_t) \mathbf{1}_{S_t}\| \leq \epsilon$

9: **return** All  $\{p_{\mathbf{x}_t}(S_t), S_t\}$  pairs.

---



219 **Extension function, training, and inference.** Once the decomposition algorithm provides  $\mathcal{D}_C(\mathbf{x})$ , we  
 220 can use it to compute our loss function. For the extension to be well defined, the decomposition needs  
 221 to deterministically map each point in the polytope to vertex-probability pairs. This is guaranteed  
 222 in our constructions. It is also straightforward to compute derivatives of the extension with respect  
 223 to the neural network parameters. For simplicity, suppose the encoder network, parameterized by  
 224 weights  $\theta$ , outputs  $\mathbf{x} \in \mathcal{P}(\mathcal{C})$ . Then, we have  $\frac{\partial F}{\partial \theta} = \frac{\partial F}{\partial p(\mathbf{x})} \cdot \frac{\partial p(\mathbf{x})}{\partial \mathbf{x}} \cdot \frac{\partial \mathbf{x}}{\partial \theta}$  where  $p(\mathbf{x})$  is the vector of  
 225 probabilities returned by Algorithm 1.

226 The extension  $F(\mathbf{x}) = \mathbb{E}_{S \sim \mathcal{D}_C(\mathbf{x})}[f(S)] = \sum_t p_{\mathbf{x}_t}(S_t) f(S_t)$  has several desirable properties that  
 227 have been studied in the literature [35]. Since we are considering convex combinations of the objective  
 228 over the feasible set, the extreme points are preserved i.e.,  $\max_{\mathbf{x} \in \mathcal{P}(\mathcal{C})} F(\mathbf{x}) = \max_{S \in \mathcal{C}} f(S)$ ;  
 229 moreover we have  $\arg\max_{\mathbf{x} \in \mathcal{P}(\mathcal{C})} F(\mathbf{x}) \in \text{Conv}(\{\mathbf{1}_S : S \in \arg\max_{S \in \mathcal{C}} f(S)\})$ . The expectation  
 230 formulation also provides a rounding guarantee. There exists at least one feasible solution  $S^*$  in the  
 231 decomposition of  $\mathbf{x}$  such that  $f(S^*) \geq F(\mathbf{x})$ . This property enables fast inference on the output of  
 232 the encoder network without any degradation in solution quality.

## 233 4.2 Case studies

234 In this section we discuss how the decomposition can be generated for various constraints. We  
 235 provide a detailed treatment of the cardinality constraint to build intuition and then discuss additional  
 236 examples including spanning trees and independent sets. All proofs, additional details and additional  
 237 experiments can be found in the Appendix.

### 238 4.2.1 Cardinality constraint

239 Here, we focus on combinatorial problems that involve optimizing a set function under an exact  
 240 cardinality constraint. This setting is sufficiently general to encompass many fundamental and  
 241 practical combinatorial optimization problems. Formally, let  $f : 2^V \rightarrow \mathbb{R}$  be a set function that  
 242 assigns a real value to each subset of  $V = \{v_1, \dots, v_n\}$ . For a given positive integer  $k$ , the set of  
 243 feasible solutions is defined as  $\mathcal{C} = \{S : |S| = k, S \subseteq V\}$ , which includes all subsets of  $V$  of size  
 244 exactly  $k$ . The resulting constrained combinatorial optimization problem is:

$$\max_{\mathbf{x} \in \{0,1\}^n, \|\mathbf{x}\|_1 = k} f(\mathbf{x}). \quad (4)$$

245 The associated convex polytope,  $\mathcal{P}(\mathcal{C}) = \text{Conv}(\{\mathbf{1}_S : |S| = k\})$ , is the convex hull of Boolean  
 246 vectors with exactly  $k$  ones and  $n - k$  zeros and the *matroid base polytope* corresponding to a uniform  
 247 matroid on  $n$  elements of rank  $k$ . It is known as the  $(k,n)$ -hypersimplex and is denoted by  $\Delta_{n,k}$  [71].

248 **Designing the decomposition algorithm.** For now, we assume that our predictions lie in the polytope  
 249 of the feasible set, i.e.  $\mathbf{x} \in \Delta_{n,k}$ . To construct a decomposition, we need to ensure that steps 3 and 4  
 250 in Algorithm 1 comply with our conditions for efficient end-to-end learning. To obtain a vertex of the  
 251 polytope in the support of  $\mathbf{x}_t$  for Step 3 in Algorithm 1, we set

$$\mathbf{1}_{S_t} = \arg\max_{\mathbf{y} \in \{0,1\}^n, \|\mathbf{y}\|_1 = k} \mathbf{x}_t^\top \mathbf{y}. \quad (5)$$

252 For step 4, we use Equation (3) to calculate the largest possible coefficient that keeps the iterate in  
 253 the polytope. This yields

$$a_t = \min \left\{ \min_{i \in S_t} \mathbf{x}_t(i), 1 - \max_{i \notin S_t} \mathbf{x}_t(i) \right\}. \quad (6)$$

254 The following result shows that our decomposition algorithm produces a valid convex decomposition  
 255 of points in the hypersimplex and is suitable for end-to-end learning.

256 **Theorem 4.2.** *For  $\mathbf{x} \in \Delta_{n,k}$ , Algorithm 1 with Step 3 according to Equation (5) and Step 4  
 257 according to Equation (6), terminates in at most  $n$  iterations and returns probability-vertex pairs  
 258  $\{(p_{\mathbf{x}_t}(S_t), \mathbf{1}_{S_t})\}$  such that every  $S_t$  is a set of size  $k$  and  $\mathbf{x} = \sum_t p_{\mathbf{x}_t}(S_t) \mathbf{1}_{S_t}$ . Moreover, each  
 259  $p_{\mathbf{x}_t}(S_t)$  is a continuous and a.e. differentiable function of  $\mathbf{x}$ .*

260 Intuitively, the result follows a similar strategy as Theorem B.3. Our choice of coefficient ensures  
 261 that the next iterate intersects the boundary of the polytope and lies in a lower-dimensional space.  
 262 This in turn guarantees that the algorithm terminates in at most  $n$  steps.

263 **Generating neural predictions in the hypersimplex.** The last concern to address is that of obtaining  
 264 a vector  $\mathbf{x} \in \Delta_{n,k}$  in an efficient and differentiable manner. We follow the perturbation strategy that  
 265 we outlined earlier and use the neural network to predict a perturbation vector  $\mathbf{z} \in [0, 1]^n$  for an  
 266 interior point. The following result ensures that the perturbed point  $\mathbf{x}$  remains in the polytope.

267 **Proposition 4.3.** *Let  $\mathbf{z} \in [0, 1]^n$  and  $\mathbf{u} = [\frac{k}{n}, \frac{k}{n}, \dots, \frac{k}{n}]$ . Let  $\mu$  be the mean of  $\mathbf{z}$ , and  $\tilde{\mathbf{z}}$  be the*  
 268 *mean-centered version of  $\mathbf{z}$ . For  $s = \min(\frac{k/n}{\mu}, \frac{(n-k)/n}{1-\mu})$  and  $\mathbf{x} = s\tilde{\mathbf{z}} + \mathbf{u}$ , we have that  $\mathbf{x} \in \Delta_{n,k}$ .*

269 This simple transformation is efficient to compute and maintains differentiability of  $\mathbf{x}$  with respect to  
 270 the neural network parameters.

## 271 4.2.2 Decomposition for Partition Matroids, Spanning Trees, and Independent Sets

272 **Partition Matroids.** We extend our result to general constraints beyond cardinality. Let  $V_1, \dots, V_c$   
 273 be disjoint subsets with  $V = \cup_{i=1}^d V_i$ . The CO problem is  $\max_{S: |S \cap V_i| = k_i} f(S)$ . When  $c = 1$ , this  
 274 reduces to the cardinality case. In step 3 of Algorithm 1, we obtain a vertex in the support of  $\mathbf{x}_t$   
 275 by setting  $\mathbf{1}_{S_t} = \arg\max_{\mathbf{y} \in \{0,1\}^n, \|\mathbf{y}(V_i)\|_1 = k_i} \mathbf{x}_t^\top \mathbf{y}$ . Step 4 matches Equation (6). The encoder can  
 276 similarly be constrained to the polytope, with scaling factor  $s$  being handled per partition.

277 **Spanning Trees.** Let  $G = (V, E)$  be a graph with  $n$  nodes and  $m$  edges. The CO problem is  
 278  $\max_{S \subseteq E: S \in \mathcal{F}} f(S)$ , where  $\mathcal{F}$  is the set of full *spanning forests* of  $G$ . The convex hull of feasible sets  
 279 is the *graphical matroid base polytope*. In Step 3 of Algorithm 1, we obtain a vertex in the support of  
 280  $\mathbf{x}_t$  by finding a maximum spanning forest. Step 4 matches Equation (6). The encoder learns edge  
 281 weights to perturb the uniform spanning tree distribution, where we use Kirchhoff’s Matrix–Tree  
 282 Theorem [40] and results from spectral graph theory.

283 **Independent Sets.** The maximum independent set problem is an NP-hard problem where the goal is  
 284 to find the largest subset of nodes  $S$  in a graph  $G = (V, E)$  such that no pair of nodes in  $S$  is adjacent.  
 285 There is no compact description of the polytope of independent sets of a graph, so it is a particularly  
 286 challenging case. We instead work on its relaxation, which admits a compact description and is  
 287 known as the *fractional stable set polytope* [55]. We use a fast gradient-based approach to project  
 288 to the polytope. For Step 3 of the decomposition, we follow a similar approach to Equation (5) and  
 289 use a greedy independent set algorithm. For Step 4, similar to the cardinality constraint case, in each  
 290 iteration we select the largest coefficient that does not violate the polytope constraints.

## 291 5 Experiments

### 292 5.1 Experimental setup

293 We consider the Maximum Coverage problem [38], a fundamental combinatorial problem with  
 294 many variants that have been extensively studied. It appears in numerous applications, including  
 295 document summarization [54] and identifying influential users in social networks [36, 14]. Let  
 296  $U = \{e_1, \dots, e_m\}$  be a set of  $n$  elements and  $V = \{T_1, \dots, T_n\}$  be  $n$  subsets of  $U$ . Given  $k \leq n$ ,  
 297 the Max Coverage problem asks for  $k$  subsets whose union covers the largest number of elements.  
 298 In the weighted version, each  $e_i$  has a weight, and the goal is to maximize the total weight of  
 299 covered elements. This problem can be represented as a bipartite graph  $G = (U, V, E)$ , where  
 300  $(e_j, T_i) \in E$  iff  $e_j \in T_i$ . A node  $u \in U$  is covered by  $S \subseteq V$  if it is adjacent to some vertex in  
 301  $S$ . Set  $f(S, u) = 1$  if  $u$  is covered by  $S$ , and  $f(S, u) = 0$  otherwise. The optimization problem is  
 302  $\max_{S \subseteq V, |S|=k} \sum_{u \in U} f(S, u)$ .

303 **Problem Encoder:** To encode the bipartite graph, we exploit three layers of GraphSage [27] followed  
 304 by a fully-connected layer with our *noise perturbation layer* to map the output vector to the hypersim-  
 305 plex  $\Delta_{n,k}$ . We also added normalization and residual connections in between the GraphSage layers  
 306 to improve gradient flow and mitigate over-smoothing during training.

307 **Baselines.** We adopt the same baselines as prior work, including: random, which samples  $k$   
 308 candidates uniformly at random over multiple trials and selects the best within 240 seconds; Greedy  
 309 algorithm [61] that iteratively adds the element with the largest marginal gain and achieves a  
 310 well-known  $(1 - \frac{1}{e})$ -approximation guarantee; Gurobi for exact MIP-based solutions, with time  
 311 limited to 120 seconds for each graph; CardNN [87] and its variants (with and without test-time  
 312 optimization, following [9] approach) ; a naive version of EGN with a naive probabilistic objective

Table 1: Performance comparison of our method against baseline approaches across three evaluation settings—Learning without TTO, Learning with TTO, and non-learning/traditional baselines—on multiple datasets. Metrics used are inference time (lower is better) and objective value (higher is better). In the Learning without TTO setting, our short version consistently outperforms all baselines in both inference time and objective value, demonstrating strong learning capability. When extended to medium and long versions, our method surpasses most TTO-based baselines across datasets, with the exception of the Twitch dataset. It also outperforms the greedy algorithm on multiple benchmarks.

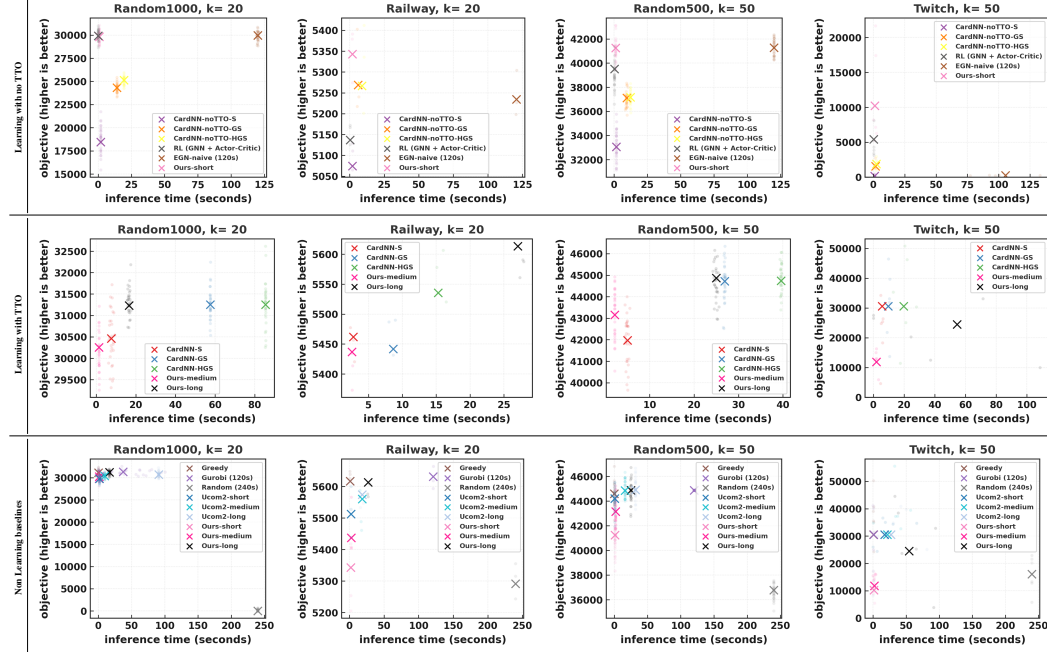

construction and iterative rounding [34]; UCOM2 with variants [9]; and a Reinforcement Learning (RL) baseline. For the RL baseline, we follow the instructions in [45, 70] to use GraphSage layers [26] as policy network with Actor-Critic [44] algorithm to train on the same problem instances. We classify UCOM2 as a non-learning method because their incremental greedy de-randomization, when applied to a uniform noise or all-zero input vector, performs as well as—or in some cases better than—when applied to the output of their encoder network suggesting that its performance is mostly due to the greedy module.

**Dataset and training.** We use synthetic graphs for training and real-world graphs for testing. Two  $k$  values are chosen per dataset to assess method generalizability. (Due to space constraints, only one value of  $k$  is shown; the full set is in the appendix.) **Random graphs:** the number in front of “Random” indicates the size of  $U$ . Each group contains 100 graphs from either a uniform or Pareto distribution. **Real-world graphs:** Built from set systems like Twitch and Railway, each group includes multiple graphs from the same source for broader coverage. Due to limited large-scale data, real-world datasets are used only for testing, with training done on synthetic data. We point out that scaling the probability weights in Equation (6) generates diverse decompositions, exposing the model to more sets during training and inference. We use a list of *scaling factors* to produce these decompositions in *parallel*.

## 5.2 Discussion

**Learnability results.** Our end-to-end pipeline shows a very strong learning ability in comparison to the existing learning baselines. In the setting where no method performs optimization at inference time, the `short` version of our method already shows strong performance compared to existing baselines. In this variant, we apply our decomposition procedure to the output of the neural encoder and select the best set from the decomposition. Based on the rounding guarantees of our extension, the resulting discrete solution is provably at least as good as the encoder’s output. Compared to other



baselines and CardNN-noTTO (across all three variants), our inference method achieves superior efficiency in both runtime and output quality. Note that we do not include the UCOM2 method in this comparison, as it falls outside the scope of this setting; more details are provided later in the paper. Regarding the Twitch dataset, although our short method performs significantly better than other approaches in this setting, we observe that all learning-based methods perform poorly overall on this dataset. As mentioned in the introduction, this underperformance is largely attributed to the architecture of the encoder network and the specific characteristics of the data distribution. This highlights a need for further investigation and suggests that adapting the model architecture to better suit such data is an important direction for future work.

**Test-Time Optimization (TTO).** In this setting, additional computational time is allowed during inference to improve solution quality. Specifically, we perform a simple optimization procedure: after selecting the best set from the decomposition of the encoder output, we apply local improvement by swapping a few elements with those from other sets in the decomposition’s support. This lightweight optimization step demonstrates that the encoder has successfully learned meaningful structure from the data, as reflected in the quality of the decomposition’s support. This is the medium variant of our method. In the long version we moreover perform data augmentation similar to [33]. These procedures yield noticeable improvements on the Random500 and Random1000 datasets, and produce reasonably good results on the Railway dataset. On the twitch dataset, the CardNN methods directly optimize the neural network output on the test sample with Adam, therefore overcoming the model architecture problem. For our methods, performance remains poor on the Twitch dataset, consistent with observations discussed earlier.

**Comparison with Non-Learning methods.** While greedy is an efficient baseline with a strong approximation guarantee, our method performs competitively and is capable of outperforming it on datasets like Random500 for larger values of  $k$ . We are also able to outperform UCOM in several cases (e.g., Random1000 and Railway), though there are instances where greedy and/or UCOM perform the best, such as the twitch dataset.

**Ablation.** We conduct an ablation study on the NP-hard problem of finding a cardinality-constrained maximum cut. Given a graph  $G = (V, E)$ , the goal is to find a set  $S$  of  $k$  nodes such that the number of edges with exactly one endpoint in  $S$  is maximized. We compare the following baselines on two datasets and two settings for the value  $k$ . Our decomposition-based method consists of two main parts: a NN to predict a point in the polytope, and a loss function to optimize it and aid in learning. To probe the effect of the loss function, we compare the quality of solutions obtained by the decomposition when the input is i) a random point projected onto the polytope ii) a random point optimized with Adam on the loss. To probe the effect of the neural network, we test the solutions obtained by the decomposition of the predictions of a neural network that has optimized the loss on the same data. Finally, to assess generalization, we compare the decomposed sets obtained from the predictions of a neural net that has been trained on a separate training set. As a sanity check, we also include a greedy algorithm. Due to space constraints the table and more details of the experiment are provided in the appendix. We consistently observe that directly optimizing the extension on the test set with Adam significantly improves the objective compared to randomly decomposing a point and reporting the result of the best performing set. Furthermore, the neural net trained directly on the test set improves consistently over direct optimization with Adam and is competitive with greedy pointing to the benefits of parametrization. Finally, the performance of the SSL approach is close to the competing neural baseline, suggesting that the model generalizes well.

## 6 Conclusion

We proposed a novel geometric approach to neural Combinatorial Optimization with constraints that effectively tackles the challenges of loss function design and rounding. Our method achieved strong empirical results against both neural baselines and classical methods, and opens up promising avenues for further research on incorporating classical geometric algorithms into neural net pipelines. It is important to note that the model architecture can play an important role in results; while we did not address this aspect here, it merits further exploration in future work. While our framework directly applies to a range of problems, some more complex constraints will require new decomposition algorithms. This can be difficult in cases where a compact description of the convex polytope is not available. Nevertheless, we believe that the blueprint described in this work paves the way towards machine learning algorithms that will effectively tackle these challenges.

## References

- [1] Saeed Amizadeh, Sergiy Matusevych, and Markus Weimer. Learning to solve circuit-sat: An unsupervised differentiable approach. In *International conference on learning representations*, 2018. 1, 3
- [2] Saeed Amizadeh, Sergiy Matusevych, and Markus Weimer. Pdp: A general neural framework for learning constraint satisfaction solvers, 2019. 3
- [3] Siddharth Barman. Approximating nash equilibria and dense bipartite subgraphs via an approximate version of caratheodory’s theorem. In *Proceedings of the forty-seventh annual ACM symposium on Theory of computing*, pages 361–369, 2015. 3
- [4] Irwan Bello, Hieu Pham, Quoc V. Le, Mohammad Norouzi, and Samy Bengio. Neural combinatorial optimization with reinforcement learning, 2017. URL <https://openreview.net/forum?id=rJY3vK9eg>. 16
- [5] Quentin Berthet, Mathieu Blondel, Olivier Teboul, Marco Cuturi, Jean-Philippe Vert, and Francis R Bach. Learning with differentiable perturbed optimizers. In *NeurIPS*, 2020. 3
- [6] Lucio Bianco, Giovanni Rinaldi, and Antonio Sassano. *A combinatorial optimization approach to aircraft sequencing problem*. Springer, 1987. 1
- [7] Shaileshh Bojja Venkatakrishnan, Mohammad Alizadeh, and Pramod Viswanath. Costly circuits, submodular schedules and approximate carathéodory theorems. In *Proceedings of the 2016 ACM SIGMETRICS International Conference on Measurement and Modeling of Computer Science*, pages 75–88, 2016. 3
- [8] Endre Boros and Peter L Hammer. Pseudo-boolean optimization. *Discrete applied mathematics*, 123(1-3):155–225, 2002. 4
- [9] Fanchen Bu, Hyeonsoo Jo, Soo Yong Lee, Sungsoo Ahn, and Kijung Shin. Tackling prevalent conditions in unsupervised combinatorial optimization: Cardinality, minimum, covering, and more. *arXiv preprint arXiv:2405.08424*, 2024. 3, 7, 8, 28, 29
- [10] G. Calinescu, C. Chekuri, M. Pál, and J. Vondrák. Maximizing a submodular set function subject to a matroid constraint. *SIAM J. Computing*, 40(6), 2011. 20
- [11] Quentin Cappart, Didier Chételat, Elias B Khalil, Andrea Lodi, Christopher Morris, and Petar Velickovic. Combinatorial optimization and reasoning with graph neural networks. *J. Mach. Learn. Res.*, 24:130–1, 2023. 16
- [12] Constantin Carathéodory. Über den variabilitätsbereich der koeffizienten von potenzreihen, die gegebene werte nicht annehmen. *Mathematische Annalen*, 64(1):95–115, 1907. 2
- [13] Chandra Chekuri and Amit Kumar. Maximum coverage problem with group budget constraints and applications. In *International Workshop on Randomization and Approximation Techniques in Computer Science*, pages 72–83. Springer, 2004. 21
- [14] Wei Chen, Xiaoming Sun, Jialin Zhang, and Zhijie Zhang. Network inference and influence maximization from samples. In *Proceedings of the 38th International Conference on Machine Learning*, pages 1707–1716, 2021. 7
- [15] Yongqiang Chen, Yatao Bian, Bo Han, and James Cheng. Interpretable and generalizable graph learning via subgraph multilinear extension. In *ICLR 2024 Workshop on Machine Learning for Genomics Explorations*, 2024. 3
- [16] Cyrille W Combettes and Sebastian Pokutta. Revisiting the approximate carathéodory problem via the frank-wolfe algorithm. *Mathematical Programming*, 197(1):191–214, 2023. 3
- [17] Priya L Donti, David Rolnick, and J Zico Kolter. Dc3: A learning method for optimization with hard constraints. *arXiv preprint arXiv:2104.12225*, 2021. 3

- [18] Vijay Prakash Dwivedi, Anh Tuan Luu, Thomas Laurent, Yoshua Bengio, and Xavier Bresson. Graph neural networks with learnable structural and positional representations. *arXiv preprint arXiv:2110.07875*, 2021. 39
- [19] Adam N Elmachtoub and Paul Grigas. Smart “predict, then optimize”. *Management Science*, 68(1):9–26, 2022. 16
- [20] Yahya H Ezzeldin, Martina Cardone, Christina Fragouli, and Giuseppe Caire. Polynomial-time capacity calculation and scheduling for half-duplex 1-2-1 networks. In *2019 IEEE International Symposium on Information Theory (ISIT)*, pages 460–464. IEEE, 2019. 3
- [21] Thomas Frerix, Matthias Nießner, and Daniel Cremers. Homogeneous linear inequality constraints for neural network activations. In *Proceedings of the IEEE/CVF Conference on Computer Vision and Pattern Recognition Workshops*, pages 748–749, 2020. 3
- [22] Tobias Friedrich, Andreas Göbel, Frank Neumann, Francesco Quinzan, and Ralf Rothenberger. Greedy maximization of functions with bounded curvature under partition matroid constraints. In *Proceedings of the AAAI Conference on Artificial Intelligence*, volume 33, pages 2272–2279, 2019. 21
- [23] Elīza Gaile, Andis Draguns, Emīls Ozoliņš, and Kārlis Freivalds. Unsupervised training for neural tsp solver. In *International Conference on Learning and Intelligent Optimization*, pages 334–346. Springer, 2022. 3
- [24] Martin Grötschel, László Lovász, and Alexander Schrijver. *Geometric algorithms and combinatorial optimization*, volume 2. Springer Science & Business Media, 2012. 3, 5, 16, 17, 19
- [25] Aditya Grover, Eric Wang, Aaron Zweig, and Stefano Ermon. Stochastic optimization of sorting networks via continuous relaxations. In *International Conference on Learning Representations*, 2018. 3
- [26] Will Hamilton, Payal Bajaj, Marinka Zitnik, Dan Jurafsky, and Jure Leskovec. Embedding logical queries on knowledge graphs. *Advances in neural information processing systems*, 31, 2018. 8, 29
- [27] William L. Hamilton, Rex Ying, and Jure Leskovec. Inductive representation learning on large graphs, 2018. URL <https://arxiv.org/abs/1706.02216>. 7
- [28] Ruben Hoeksma, Bodo Manthey, and Marc Uetz. Efficient implementation of carathéodory’s theorem for the single machine scheduling polytope. *Discrete applied mathematics*, 215: 136–145, 2016. 3, 5
- [29] Seong-Hyun Hong, Hyun-Sung Kim, Zian Jang, Deunsol Yoon, Hyungseok Song, and Byung-Jun Lee. Unsupervised training of diffusion models for feasible solution generation in neural combinatorial optimization. *arXiv preprint arXiv:2411.00003*, 2024. 3
- [30] Xiuzhen Huang, Jing Lai, and Steven F Jennings. Maximum common subgraph: some upper bound and lower bound results. *BMC bioinformatics*, 7:1–9, 2006. 1
- [31] Jan Hůla, David Mojžíšek, and Mikoláš Janota. Understanding gnns for boolean satisfiability through approximation algorithms. In *Proceedings of the 33rd ACM International Conference on Information and Knowledge Management*, pages 953–961, 2024. 3
- [32] Yuma Ichikawa. Controlling continuous relaxation for combinatorial optimization. *Advances in Neural Information Processing Systems*, 37:47189–47216, 2024. 3
- [33] Wei Jin, Tong Zhao, Jiayuan Ding, Yozen Liu, Jiliang Tang, and Neil Shah. Empowering graph representation learning with test-time graph transformation. In *The Eleventh International Conference on Learning Representations*, 2023. 9
- [34] Nikolaos Karalias and Andreas Loukas. Erdos goes neural: an unsupervised learning framework for combinatorial optimization on graphs. *arXiv preprint arXiv:2006.10643*, 2020. 1, 3, 8, 29

- [35] Nikolaos Karalias, Joshua Robinson, Andreas Loukas, and Stefanie Jegelka. Neural set function extensions: Learning with discrete functions in high dimensions. *Advances in Neural Information Processing Systems*, 35:15338–15352, 2022. 1, 3, 6, 16
- [36] David Kempe, Jon Kleinberg, and Éva Tardos. Maximizing the spread of influence through a social network. In *Proceedings of the Ninth ACM SIGKDD International Conference on Knowledge Discovery and Data Mining*, KDD '03, page 137–146. Association for Computing Machinery, 2003. 7
- [37] Nicolas Keriven and Samuel Vaiter. What functions can graph neural networks compute on random graphs? the role of positional encoding. *Advances in Neural Information Processing Systems*, 36:11823–11849, 2023. 3
- [38] Samir Khuller, Anna Moss, and Joseph Seffi Naor. The budgeted maximum coverage problem. *Information processing letters*, 70(1):39–45, 1999. 7, 21
- [39] Diederik P Kingma and Jimmy Ba. Adam: A method for stochastic optimization. *arXiv preprint arXiv:1412.6980*, 2014. 39
- [40] Gustav Kirchhoff. Ueber die auflösung der gleichungen, auf welche man bei der untersuchung der linearen vertheilung galvanischer ströme geführt wird. *Annalen der Physik*, 148(12): 497–508, 1847. 7, 26
- [41] Till Kletti, Jean-Michel Renders, and Patrick Loiseau. Introducing the expohedron for efficient pareto-optimal fairness-utility amortizations in repeated rankings. In *Proceedings of the Fifteenth ACM International Conference on Web Search and Data Mining*, pages 498–507, 2022. 3, 5
- [42] Marcel Kollovich, Bertrand Charpentier, Daniel Zügner, and Stephan Günnemann. Expected probabilistic hierarchies. *Advances in Neural Information Processing Systems*, 37:13818–13850, 2024. 3
- [43] Vijay Konda and John Tsitsiklis. Actor-critic algorithms. In S. Solla, T. Leen, and K. Müller, editors, *Advances in Neural Information Processing Systems*, volume 12. MIT Press, 1999. URL [https://proceedings.neurips.cc/paper\\_files/paper/1999/file/6449f44a102fde848669bdd9eb6b76fa-Paper.pdf](https://proceedings.neurips.cc/paper_files/paper/1999/file/6449f44a102fde848669bdd9eb6b76fa-Paper.pdf). 16
- [44] Vijay Konda and John Tsitsiklis. Actor-critic algorithms. In S. Solla, T. Leen, and K. Müller, editors, *Advances in Neural Information Processing Systems*, volume 12. MIT Press, 1999. URL [https://proceedings.neurips.cc/paper\\_files/paper/1999/file/6449f44a102fde848669bdd9eb6b76fa-Paper.pdf](https://proceedings.neurips.cc/paper_files/paper/1999/file/6449f44a102fde848669bdd9eb6b76fa-Paper.pdf). 8, 29
- [45] Wouter Kool, Herke van Hoof, and Max Welling. Attention, learn to solve routing problems!, 2019. URL <https://arxiv.org/abs/1803.08475>. 8, 16, 29
- [46] Andreas Krause, Carlos Guestrin, Anupam Gupta, and Jon Kleinberg. Near-optimal sensor placements: Maximizing information while minimizing communication cost. In *Proceedings of the 5th international conference on Information processing in sensor networks*, pages 2–10, 2006. 20
- [47] Yeong-Dae Kwon, Jinho Choo, Byoungjip Kim, Iljoo Yoon, Youngjune Gwon, and Seungjai Min. Pomo: Policy optimization with multiple optima for reinforcement learning. In H. Larochelle, M. Ranzato, R. Hadsell, M.F. Balcan, and H. Lin, editors, *Advances in Neural Information Processing Systems*, volume 33, pages 21188–21198. Curran Associates, Inc., 2020. URL [https://proceedings.neurips.cc/paper\\_files/paper/2020/file/f231f2107df69eab0a3862d50018a9b2-Paper.pdf](https://proceedings.neurips.cc/paper_files/paper/2020/file/f231f2107df69eab0a3862d50018a9b2-Paper.pdf). 16
- [48] Xinpeng Li, Enming Liang, and Minghua Chen. Gauge flow matching for efficient constrained generative modeling over general convex set. In *ICLR 2025 Workshop on Deep Generative Model in Machine Learning: Theory, Principle and Efficacy*, 2025. 3
- [49] Yujia Li, Daniel Tarlow, Marc Brockschmidt, and Richard Zemel. Gated graph sequence neural networks. *arXiv preprint arXiv:1511.05493*, 2015. 39

- [50] Enming Liang and Minghua Chen. Efficient bisection projection to ensure nn solution feasibility for optimization over general set. **3**
- [51] Enming Liang, Minghua Chen, and Steven Low. Low complexity homeomorphic projection to ensure neural-network solution feasibility for optimization over (non-) convex set. 2023. **3**
- [52] Enming Liang, Minghua Chen, and Steven H Low. Homeomorphic projection to ensure neural-network solution feasibility for constrained optimization. *Journal of Machine Learning Research*, 25(329):1–55, 2024. **3**
- [53] Derek Lim, Joshua Robinson, Lingxiao Zhao, Tess Smidt, Suvrit Sra, Haggai Maron, and Stefanie Jegelka. Sign and basis invariant networks for spectral graph representation learning. *arXiv preprint arXiv:2202.13013*, 2022. **3**
- [54] Hui Lin and Jeff Bilmes. A class of submodular functions for document summarization. In *Proceedings of the 49th Annual Meeting of the Association for Computational Linguistics: Human Language Technologies*, pages 510–520, 2011. **7**
- [55] László Lovász. Semidefinite programs and combinatorial optimization. In *Recent advances in algorithms and combinatorics*, pages 137–194. Springer, 2003. **7, 27, 28**
- [56] Gonzalo Mena, David Belanger, Scott Linderman, and Jasper Snoek. Learning latent permutations with gumbel-sinkhorn networks. In *International Conference on Learning Representations*, 2018. **3**
- [57] Yimeng Min, Frederik Wenkel, Michael Perlmutter, and Guy Wolf. Can hybrid geometric scattering networks help solve the maximum clique problem? *Advances in Neural Information Processing Systems*, 35:22713–22724, 2022. **3**
- [58] Azalia Mirhoseini, Anna Goldie, Mustafa Yazgan, Joe Jiang, Ebrahim Songhori, Shen Wang, Young-Joon Lee, Eric Johnson, Omkar Pathak, Sungmin Bae, et al. Chip placement with deep reinforcement learning. *arXiv preprint arXiv:2004.10746*, 2020. **1**
- [59] Vahab Mirrokni, Renato Paes Leme, Adrian Vladu, and Sam Chiu-wai Wong. Tight bounds for approximate carathéodory and beyond. In *International Conference on Machine Learning*, pages 2440–2448. PMLR, 2017. **3**
- [60] Konrad Munding, Max Zimmer, Aldo Kiem, Christoph Spiegel, and Sebastian Pokutta. Neural discovery in mathematics: Do machines dream of colored planes? *arXiv preprint arXiv:2501.18527*, 2025. **3**
- [61] George L. Nemhauser, Laurence A. Wolsey, and Marshall L. Fisher. An analysis of approximations for maximizing submodular set functions - I. *Math. Program.*, 14(1):265–294, 1978. **7, 29**
- [62] Robert R Nerem, Zhishang Luo, Akbar Rafiey, and Yusu Wang. Differentiable extensions with rounding guarantees for combinatorial optimization over permutations. *arXiv preprint arXiv:2411.10707*, 2024. **3**
- [63] Emils Ozolins, Karlis Freivalds, Andis Draguns, Eliza Gaile, Ronalds Zakovskis, and Sergejs Kozlovics. Goal-aware neural sat solver. In *2022 International Joint Conference on Neural Networks (IJCNN)*, pages 1–8. IEEE, 2022. **3**
- [64] Panos M Pardalos and Mauricio GC Resende. Handbook of applied optimization. (*No Title*), 2002. **1**
- [65] Anselm Paulus, Michal Rolínek, Vít Musil, Brandon Amos, and Georg Martius. Comboptnet: Fit the right np-hard problem by learning integer programming constraints. *arXiv preprint arXiv:2105.02343*, 2021. **16**
- [66] Anselm Paulus, Georg Martius, and Vít Musil. Lpgd: A general framework for backpropagation through embedded optimization layers. *arXiv preprint arXiv:2407.05920*, 2024. **16**
- [67] Max Benedikt Paulus, Dami Choi, Daniel Tarlow, Andreas Krause, and Chris J Maddison. Gradient estimation with stochastic softmax tricks. In *NeurIPS 2020*, 2020. **3**



- [68] Marin Vlastelica Pogančič, Anselm Paulus, Vit Musil, Georg Martius, and Michal Rolínek. Differentiation of blackbox combinatorial solvers. In *International Conference on Learning Representations*, 2019. 16
- [69] Ruizhong Qiu, Zhiqing Sun, and Yiming Yang. Dimes: A differentiable meta solver for combinatorial optimization problems. In S. Koyejo, S. Mohamed, A. Agarwal, D. Belgrave, K. Cho, and A. Oh, editors, *Advances in Neural Information Processing Systems*, volume 35, pages 25531–25546. Curran Associates, Inc., 2022. URL [https://proceedings.neurips.cc/paper\\_files/paper/2022/file/a3a7387e49f4de290c23beea2dfcdc75-Paper-Conference.pdf](https://proceedings.neurips.cc/paper_files/paper/2022/file/a3a7387e49f4de290c23beea2dfcdc75-Paper-Conference.pdf). 16
- [70] Ruizhong Qiu, Zhiqing Sun, and Yiming Yang. DIMES: A differentiable meta solver for combinatorial optimization problems. In Alice H. Oh, Alekh Agarwal, Danielle Belgrave, and Kyunghyun Cho, editors, *Advances in Neural Information Processing Systems*, 2022. URL <https://openreview.net/forum?id=9u05zrOnhx>. 8, 29
- [71] Fred J Rispoli. The graph of the hypersimplex. *arXiv preprint arXiv:0811.2981*, 2008. 6
- [72] Michael Eli Sander, Joan Puigcerver, Josip Djolonga, Gabriel Peyré, and Mathieu Blondel. Fast, differentiable and sparse top-k: a convex analysis perspective. In *International Conference on Machine Learning*, pages 29919–29936. PMLR, 2023. 3
- [73] Sebastian Sanokowski, Sepp Hochreiter, and Sebastian Lehner. A diffusion model framework for unsupervised neural combinatorial optimization. In *Proceedings of the 41st International Conference on Machine Learning*, pages 43346–43367, 2024. 3
- [74] Aditya P Saraf and Gary L Slater. An efficient combinatorial optimization algorithm for optimal scheduling of aircraft arrivals at congested airports. In *2006 IEEE aerospace conference*, pages 11–pp. IEEE, 2006. 1
- [75] Ryoma Sato, Makoto Yamada, and Hisashi Kashima. Approximation ratios of graph neural networks for combinatorial problems, 2019. 3
- [76] Alexander Schrijver. *Theory of linear and integer programming*. John Wiley & Sons, 1998. 17
- [77] Martin JA Schuetz, J Kyle Brubaker, and Helmut G Katzgraber. Combinatorial optimization with physics-inspired graph neural networks. *Nature Machine Intelligence*, 4(4):367–377, 2022. 3
- [78] Martin JA Schuetz, J Kyle Brubaker, Zhihuai Zhu, and Helmut G Katzgraber. Graph coloring with physics-inspired graph neural networks. *Physical Review Research*, 4(4):043131, 2022. 3
- [79] Richard Sinkhorn. A relationship between arbitrary positive matrices and doubly stochastic matrices. *The annals of mathematical statistics*, 35(2):876–879, 1964. 5
- [80] Daniel A Spielman and Nikhil Srivastava. Graph sparsification by effective resistances. In *Proceedings of the fortieth annual ACM symposium on Theory of computing*, pages 563–568, 2008. 26
- [81] Haoran Sun, Etash K Guha, and Hanjun Dai. Annealed training for combinatorial optimization on graphs. *arXiv preprint arXiv:2207.11542*, 2022. 3
- [82] Richard S Sutton, David A McAllester, Satinder P Singh, and Yishay Mansour. Policy gradient methods for reinforcement learning with function approximation. In *Advances in neural information processing systems*, pages 1057–1063, 2000. 16
- [83] Jan Toenschhoff, Martin Ritzert, Hinrikus Wolf, and Martin Grohe. Graph neural networks for maximum constraint satisfaction. *Frontiers in artificial intelligence*, 3:98, 2021. 1, 3
- [84] Oriol Vinyals, Meire Fortunato, and Navdeep Jaitly. Pointer networks. In C. Cortes, N. Lawrence, D. Lee, M. Sugiyama, and R. Garnett, editors, *Advances in Neural Information Processing Systems*, volume 28. Curran Associates, Inc., 2015. URL [https://proceedings.neurips.cc/paper\\_files/paper/2015/file/29921001f2f04bd3baee84a12e98098f-Paper.pdf](https://proceedings.neurips.cc/paper_files/paper/2015/file/29921001f2f04bd3baee84a12e98098f-Paper.pdf). 3, 16

- 628 [85] J. Vondrák. Optimal approximation for the submodular welfare problem in the value oracle  
629 model. In *Symposium on Theory of Computing (STOC)*, 2008. 20
- 630 [86] Haoyu Peter Wang, Nan Wu, Hang Yang, Cong Hao, and Pan Li. Unsupervised learning  
631 for combinatorial optimization with principled objective relaxation. In *Advances in Neural  
632 Information Processing Systems*, 2022. 3
- 633 [87] Runzhong Wang, Li Shen, Yiting Chen, Xiaokang Yang, Dacheng Tao, and Junchi Yan. Towards  
634 one-shot neural combinatorial solvers: Theoretical and empirical notes on the cardinality-  
635 constrained case. In *The Eleventh International Conference on Learning Representations*, 2022.  
636 5, 7, 28, 29
- 637 [88] Runzhong Wang, Yunhao Zhang, Ziao Guo, Tianyi Chen, Xiaokang Yang, and Junchi Yan.  
638 Linsatnet: the positive linear satisfiability neural networks. In *International Conference on  
639 Machine Learning*, pages 36605–36625. PMLR, 2023. 3
- 640 [89] Hao Xu, Ka-Hei Hui, Chi-Wing Fu, and Hao Zhang. Tilingnn: learning to tile with self-  
641 supervised graph neural network. *ACM Transactions on Graphics (TOG)*, 39(4):129–1, 2020.  
642 1, 3
- 643 [90] Keyulu Xu, Weihua Hu, Jure Leskovec, and Stefanie Jegelka. How powerful are graph neural  
644 networks? In *International Conference on Learning Representations*, 2019. URL <https://openreview.net/forum?id=ryGs6iA5Km>. 3
- 645
- 646 [91] Pinar Yanardag and SVN Vishwanathan. Deep graph kernels. In *Proceedings of the 21th ACM  
647 SIGKDD international conference on knowledge discovery and data mining*, pages 1365–1374,  
648 2015. 39
- 649 [92] Morris Yau, Nikolaos Karalias, Eric Lu, Jessica Xu, and Stefanie Jegelka. Are graph neural  
650 networks optimal approximation algorithms? *Advances in Neural Information Processing  
651 Systems*, 37:73124–73181, 2024. 3
- 652 [93] Bülent Yener, Yoram Ofek, and Moti Yung. Combinatorial design of congestion-free networks.  
653 *IEEE/ACM transactions on networking*, 5(6):989–1000, 1997. 1
- 654 [94] Hongtai Zeng, Chao Yang, Yanzhen Zhou, Cheng Yang, and Qinglai Guo. Glinsat: The  
655 general linear satisfiability neural network layer by accelerated gradient descent. *arXiv preprint  
656 arXiv:2409.17500*, 2024. 3, 5

## 657 A Additional discussion of related work

658 Reinforcement learning (RL)-based construction heuristics have been one of the leading paradigms  
 659 in neural CO. The first application to use RL with neural networks are [4], where they combined  
 660 a Pointer Network [84] with actor-critic reinforcement algorithm [43] to generate solutions for the  
 661 Traveling Salesman Problem. Later works including [45], [47], and [69] have gained great success in  
 662 solving larger-scale CO problems with RL algorithms, and also showed the ability to generalize to  
 663 large scale problem instances. There are similarities between our approach and the general approach  
 664 followed in RL algorithms like policy gradient[82] that are worth discussing. In RL, one learns  
 665 a distribution that maximizes the expected reward. This is done by sampling solutions from the  
 666 outputs of a neural network which are treated as the parameters of a probability distribution, then  
 667 calculating their reward and weighing it by their log probability, and finally backpropagating to the  
 668 parameters of the neural network. Stochasticity is often at the core of RL and the ways that one  
 669 may sample solutions for a given problem differ. Our goal is to propose a structured approach that  
 670 relies on methods from polyhedral combinatorics and convex geometry. Concretely, the output of  
 671 the neural network is transformed so that it yields a point in the convex hull of feasible solutions  
 672 of the problem. Then, instead of sampling, we leverage the decomposition algorithm to explicitly  
 673 construct the support of the distribution that is parametrized by the neural net output. The extension  
 674 we maximize can be viewed as the expected 'reward' (objective), which is similar to how RL operates.  
 675 In terms of differentiability, our approach is slightly different since our extension is a.e. differentiable  
 676 and we can directly use automatic differentiation while RL deals with this using techniques like the  
 677 log-derivative trick. Importantly, extensions can be used to optimize any black-box objective which  
 678 is also the case for RL.

679 Other related lines of work include the Predict then Optimize paradigm [19] which combines learned  
 680 predictions with a deterministic optimization problem that is parametrized by them. The mathematical  
 681 relationship to extensions originates from the fact that extensions can be viewed as feasible solutions  
 682 to a linear program for the convex envelope that is parametrized by some neural net predictions  
 683 [35]. Another line of work that combines predictive and algorithmic components is the work on  
 684 backpropagating through solvers [68, 65, 66]. For a more complete reference on combinatorial  
 685 optimization with (graph) neural networks we refer the reader to [11].

## 686 B Decomposition Theorem: extended discussion

687 We will provide an extended discussion of the GLS result and its implications for our decomposition  
 688 approach. For that we will need some definitions as presented in [24] in order to provide a self-  
 689 contained discussion of the theorem, its proof, and its implications for our approach.

690 **Definition B.1** (Defining properties of polyhedra). Let  $\mathcal{P} \subseteq \mathbb{R}^n$  be a polyhedron and let  $\varphi$  and  $\nu$  be  
 691 positive integers.

- 692 1. We say that  $\mathcal{P}$  has **facet-complexity** at most  $\varphi$  if there exists a system of inequalities  
 693 with rational coefficients that has solution set  $\mathcal{P}$  and such that the encoding length of each  
 694 inequality of the system is at most  $\varphi$ . In case  $\mathcal{P} = \mathbb{R}^n$  we require  $\varphi \geq n + 1$ .
- 695 2. We say that  $\mathcal{P}$  has **vertex-complexity** at most  $\nu$  if there exist finite sets  $V, E$  of rational  
 696 vectors such that
 
$$\mathcal{P} = \text{conv}(V) + \text{cone}(E)$$
 697 and such that each of the vectors in  $V$  and  $E$  has encoding length at most  $\nu$ . In case  $\mathcal{P} = \emptyset$   
 698 we require  $\nu \geq n$ .
- 699 3. A **well-described polyhedron** is a triple  $(\mathcal{P}; n, \varphi)$  where  $\mathcal{P} \subseteq \mathbb{R}^n$  is a polyhedron with  
 700 facet-complexity at most  $\varphi$ . The encoding length  $\langle \mathcal{P} \rangle$  of a well-described polyhedron  
 701  $(\mathcal{P}; n, \varphi)$  is

$$\langle \mathcal{P} \rangle = \varphi + n.$$

702 □

703 **Definition B.2** (Strong optimization problem). The strong optimization problem for a given rational  
 704 vector  $\mathbf{x}$  in  $n$  dimensions and any well described  $(\mathcal{P}; n, \varphi)$  is given by

$$\max \mathbf{c}^\top \mathbf{x}, \quad \mathbf{c} \in \mathcal{P}. \quad (7)$$

705 We may now restate Theorem B.3.

706 **Theorem B.3.** (GLS) *There exists an oracle polynomial-time algorithm that for any well-described*  
 707 *polyhedron  $(P; n, \varphi)$  given by a strong optimization oracle, for any rational vector  $\mathbf{x}$ , finds affinely*  
 708 *independent vertices  $\mathbf{1}_{S_1}, \mathbf{1}_{S_2}, \dots, \mathbf{1}_{S_k}$  and positive rational numbers  $\lambda_1, \lambda_2, \dots, \lambda_k$  such that  $\mathbf{x} =$*   
 709  *$\sum_{t=1}^k \lambda_t \mathbf{1}_{S_t}$ .*

710 *Proof.* Set  $\mathbf{x}_0 = \mathbf{x}$ . The algorithm begins by finding the smallest face that contains  $\mathbf{x}$  and then obtain  
 711 a vertex  $\mathbf{1}_{S_0}$  of that face. If that vertex is  $\mathbf{x}_0$  then the algorithm terminates. Otherwise, a half-line is  
 712 drawn from  $\mathbf{1}_{S_1}$  through  $\mathbf{x}_0$  until the boundary of the polytope is intersected. At the intersection point,  
 713 we obtain a new iterate  $\mathbf{x}_1$ . Notice that the previous iterate  $\mathbf{x}_0$  can be written as a convex combination  
 714 of  $\mathbf{x}_1$  and  $\mathbf{1}_{S_1}$  since it is part of a line with endpoints  $\mathbf{x}_1$  and  $\mathbf{1}_{S_1}$ . Again, we find the smallest face  
 715 containing  $\mathbf{x}_1$  and obtain a vertex  $\mathbf{1}_{S_2}$  from it. If it matches the iterate we terminate, otherwise we  
 716 repeat the process. Since each iterate belongs to the faces of all the previous iterates but not the  
 717 subsequent ones, the iterates are affinely independent and hence the process has to terminate in  $k \leq n$   
 718 steps. Given the starting vector and the vertices it is straightforward to compute the coefficients with  
 719 linear algebra. Furthermore the encoding length of each iterate is polynomial since it is the unique  
 720 point of intersection of affine subspaces spanned by  $\mathbf{x}$  and the vertices of the polytope.  $\square$

## 721 B.1 Necessary conditions for a valid decomposition

722 As we explained, this proof provides the blueprint for the methodology in this paper. For the proof to  
 723 yield a useful decomposition for our setting we have the following prerequisites:

- 724 1. For each iterate, finding a minimal face that contains it and retrieving a vertex from it.
- 725 2. The ability to find intersection points of half-lines with the boundary of the polytope.

726 The first point corresponds to the step 3 of our algorithm. We will see that performing this step  
 727 efficiently can be done if we have access to a fast strong optimization oracle.

728 **Obtaining a polytope vertex for Step 3 of Algorithm 1.** The proof requires a vertex of a face  
 729 containing the iterate  $\mathbf{x}_t$ . The face  $F$  containing  $\mathbf{x}_t$  is the set of vectors attaining  $\max_{\mathbf{c} \in \mathcal{P}} \mathbf{x}^\top \mathbf{c}$  [76].  
 730 Given access to the vectors of the face  $F$ , we need to be able to retrieve a vertex of that face. This  
 731 can be done by a simple technique, where we make a call to the oracle for the perturbed program

$$\max \bar{\mathbf{c}}^\top \mathbf{x}, \quad \mathbf{c} \in \mathcal{P}, \quad (8)$$

732 with  $\bar{\mathbf{c}} = \mathbf{c} + [\epsilon, \epsilon^2, \dots, \epsilon^n]^\top$  for some small epsilon [24][Remark 6.5.2].

733 **Obtaining the coefficient for Step 4 of Algorithm 1.** The second prerequisite is the ability to  
 734 compute intersection points of the boundary of the polytope with a half-line that passes through the  
 735 current iterate. This is related to step 4 of Algorithm 1. Namely, step 4 will determine the coefficients  
 736 of the convex combination that express the current iterate as a function of the current vertex and the  
 737 next iterate. To obtain some general conditions when this is possible, recall that for a general polytope

$$\mathcal{P} = \{\mathbf{x} \in \mathbb{R}^n : \mathbf{z}_i^\top \mathbf{x} \leq b_i, i = 1, \dots, m\},$$

738 In the GLS proof, the coefficient computation is resolved after all the relevant vertices of the  
 739 combination have been obtained. In our approach, we pick the convex combination coefficient as

$$a_t^{\max} = \max\{a_t \in [0, 1) : \mathbf{x}_{t+1}(a_t) \in \mathcal{P}\},$$

740 This choice of coefficient leads to the next iterate being as far as possible from the current one. This  
 741 means the coefficient will be pushed until some constraints of the polytope are tight for the new  
 742 iterate and hence the boundary will be intersected. At iteration  $t$ , with current iterate  $\mathbf{x}_t$  and chosen  
 743 corner  $\mathbf{1}_{S_t}$ , we may determine the coefficient by enforcing each face inequality. In particular:

$$\begin{aligned} \mathbf{z}_i^\top \mathbf{x}_{t+1} \leq b_i &\iff \mathbf{z}_i^\top \frac{\mathbf{x}_t - a_t \mathbf{1}_{S_t}}{1 - a_t} \leq b_i \\ &\iff a_t \leq \frac{b_i - \mathbf{z}_i^\top \mathbf{x}_t}{\mathbf{z}_i^\top (\mathbf{1}_{S_t} - \mathbf{x}_t)}, \quad \text{whenever } \mathbf{z}_i^\top (\mathbf{1}_{S_t} - \mathbf{x}_t) > 0. \end{aligned}$$

744 Hence

$$a_t^{\max}(\mathbf{x}_t) = \min_{i: \mathbf{z}_i^\top (\mathbf{1}_{S_t} - \mathbf{x}_t) > 0} \frac{b_i - \mathbf{z}_i^\top \mathbf{x}_t}{\mathbf{z}_i^\top (\mathbf{1}_{S_t} - \mathbf{x}_t)}, \quad (9)$$

745 which shows that the maximum feasible weight  $a_t$  is a well-defined differentiable function of the  
 746 current iterate  $\mathbf{x}_t$ . This is crucial because it allows us to backpropagate through the coefficient and  
 747 leverage the decomposition in gradient-based optimization. Note that we can make such an argument  
 748 assumming we have a description of the polytope in terms of inequalities.

749 Equation (9) and Equation (8) lead us to sufficient conditions for our decomposition. Specifically,  
 750 given access to a fast algorithm for Equation (9) and a fast algorithm for Equation (8) we can obtain  
 751 a tractable decomposition that allows us to build  $\mathcal{D}_C(\mathbf{x})$  in a differentiable manner. An important  
 752 observation is that both of those conditions will depend on the polytope. Indeed, for matroid  
 753 polytopes strong optimization oracles are available. A fast algorithm for Equation (8) also requires a  
 754 compact description of  $\mathcal{P}$  in terms of inequalities. If the polytope is defined by exponentially many  
 755 inequalities, computing the minimum becomes intractable. These can be challenging issues when  
 756 using our framework for constraints associated with NP-Hard problems like independent sets but we  
 757 will discuss how they can be mitigated.

## 758 C Decomposition with controlled approximation

759 One of the limitations of the decomposition as presented in the approach is that the support of the  
 760 distribution we obtain depends exactly on the ambient dimension of the space. There are a few  
 761 reasons why this might not be desirable. First, an exact decomposition like this fixes at most  $n$  sets in  
 762 the support. That may be too restrictive in problems with 'sparse rewards', i.e., when good objective  
 763 values are achieved on only a few points. It would be preferable if we had more control over the  
 764 number of sets in the support of the distribution, which could in turn lead to better outcomes for  
 765 optimization. We show how we can achieve this with a simple tweak that allows us to control the  
 766 reconstruction quality, which we also utilize in our max coverage experiments.

### 767 C.1 Decomposition via rescaling

768 Start with  $\mathbf{x}_0 = \mathbf{x}$ . For each iteration  $t = 0, 1, 2, \dots, k$ , we first pick the corner  $\mathbf{1}_{S_t}$  and compute the  
 769 iteration coefficient

$$\tilde{a}_t = \min \left\{ \min_{i \in S_t} x_t(i), \min_{j \notin S_t} (1 - x_t(j)) \right\}.$$

770 The difference now is that instead of picking the maximum coefficient we will rescale the  $\tilde{a}_t$  in each  
 771 step by some fixed constant  $b \in (0, 1]$ . This means that the next iterate will not be intersecting the  
 772 boundary and hence the algorithm will require more steps to terminate, hence requiring a tolerance  
 773 parameter  $\epsilon$  as we have described in Algorithm 1. Additionally, we fix some lower bound  $\ell$  on the  
 774 rescaling so that

$$a_t = \begin{cases} b \tilde{a}_t, & b \tilde{a}_t \geq \ell, \\ \tilde{a}_t, & b \tilde{a}_t < \ell. \end{cases} \quad (10)$$

775 Using this coefficient we compute the new iterate using Equation (3).

776 **Proposition C.1.** *Suppose we pick step 3 in Algorithm 1 according to Equation (10). Then the*  
 777 *reconstruction error of the algorithm (step 8 in Algorithm 1) decays exponentially in  $k$ .*

778 *Proof.* After  $k$  iterations we may express  $\mathbf{x}$  as

$$\mathbf{x} = \sum_{t=1}^k \underbrace{\left( \prod_{i=1}^{t-1} (1 - a_i) \right)}_{p_{\mathbf{x}_t}(S_t)} a_t \mathbf{1}_{S_t} + \left( \prod_{i=1}^k (1 - a_i) \right) \mathbf{x}_{k+1}.$$



779 Recall from step 8 of Algorithm 1 we have that the stopping criterion (given by the reconstruction  
780 error) is

$$\|\mathbf{x} - \sum_{t=1}^k p_{\mathbf{x}_t(S_t)} \mathbf{1}_{S_t}\| \leq \epsilon.$$

781 Clearly, the term inside the norm on the left hand side of the inequality is the residual

$$\mathbf{r}_{k+1} = \left( \prod_{i=1}^k (1 - a_i) \right) \mathbf{x}_{k+1}.$$

782 For the reconstruction error we just need to compute the norm of the residual and show that it decays  
783 exponentially in  $k$ . Hence, we calculate

$$\begin{aligned} \|\mathbf{r}_{k+1}\|_2 &= \left( \prod_{i=1}^k (1 - a_i) \right) \|\mathbf{x}_{k+1}\|_2 \\ &\leq (1 - \ell)^k \|\mathbf{x}\|_2 \\ &\leq (1 - \ell)^k n, \end{aligned}$$

784 which completes the proof. □

785 Given some tolerance parameter  $\epsilon$ , this allows us to control the number of sets considered in the  
786 iteration. We observed that using this approach helped with the training dynamics of the model as  
787 well as with performance.

## 788 D Deferred Proofs from Section 4.2

### 789 Proof of Theorem 4.2

790 *Proof.* The proof follows the same argument as the proof in [24][Theorem 6.5.11]. To make the  
791 result more intuitive we may assume without loss of generality that the entries of  $\mathbf{x}_t$  are sorted, i.e.  
792  $\mathbf{x}_t(1) \geq \mathbf{x}_t(2) \geq \dots \geq \mathbf{x}_t(n)$ . Under this ordering,

$$\mathbf{1}_{S_t} = \arg \max_{\substack{\mathbf{y} \in \{0,1\}^n \\ \|\mathbf{y}\|_1 = k}} \mathbf{x}_t^\top \mathbf{y},$$

793 selects exactly the top  $k$  coordinates. Since  $\|\mathbf{x}_t\|_1 = k$  and  $\|\mathbf{1}_{S_t}\|_1 = k$ , taking the  $\ell_1$ -norm of both  
794 sides of Equation (3) gives

$$k = a_t k + (1 - a_t) \|\mathbf{x}_{t+1}\|_1,$$

795 so  $\|\mathbf{x}_{t+1}\|_1 = k$  and the sum-to- $k$  constraint is preserved exactly. Apart from the norm constraint,  
796 we also have to ensure that each coordinate remains in the hypercube. To keep each coordinate in  
797 the hypercube we solve for the coefficient  $a_t$  that satisfies  $0 \leq \mathbf{x}_{t+1} \leq 1$  in our recurrence equation.  
798 First, we rearrange Equation (3)

$$\mathbf{x}_{t+1} = \frac{\mathbf{x}_t - a_t \mathbf{1}_{S_t}}{1 - a_t}$$

799 and note that subtraction at the numerator affects only the top  $k$  coordinates. It is clear that for  $i \in S_t$   
800 the coordinates cannot possibly exceed one because the denominator is always larger, but they may  
801 drop below 0. So we need to ensure

$$\frac{\mathbf{x}_t(i) - a_t}{1 - a_t} \geq 0, \tag{11}$$

802 which implies  $a_t \leq \min_{i \in S_t} \mathbf{x}_t(i)$  and corresponds to a constraint on the  $k$ -th coordinate in this  
803 ordering. On the other hand, for  $j \notin S_t$  they can only increase in magnitude, so they may exceed 1,  
804 which leads us to

$$\frac{\mathbf{x}_t(j)}{1 - a_t} \leq 1, \tag{12}$$

and hence  $a_t \leq 1 - \max_{j \notin S_t} \mathbf{x}_t(j)$  which constrains the  $(k+1)$ -th coordinate. Ensuring that both Equation (11) and Equation (12) are satisfied, and following the GLS proof, we pick the largest possible coefficient which leads us to Equation (6):

$$a_t = \min\left\{\min_{i \in S_t} \mathbf{x}_t(i), 1 - \max_{j \notin S_t} \mathbf{x}_t(j)\right\}.$$

If  $a_t = \min_{i \in S_t} \mathbf{x}_t(i)$ , the  $k$ -th entry is set to zero; otherwise the  $(k+1)$ -th coordinate is set to 1. Note that from Equation (3), once a coordinate has been fixed to either 0 or 1, it cannot change in subsequent iterations. Therefore, the process will terminate when the next iterate becomes a corner of  $\Delta_{n,k}$ . Since there are  $k$  zeros and  $n-k$  ones at the final iterate and each iteration fixes exactly one coordinate, the process terminates after at most  $k + (n-k) = n$  iterations. In line with the GLS proof, the next iterate intersects the boundary of the polytope at a face of lower dimension because the minimum is guaranteed to fix a coordinate either to 0 or to 1.

Finally, because each  $a_t$  is defined via pointwise minima and maxima of the entries of  $\mathbf{x}_t$ , it is almost everywhere differentiable in  $\mathbf{x}_t$ . By the chain rule, the resulting probability weights

$$p_{\mathbf{x}_t}(S_t) = a_t \prod_{i < t} (1 - a_i)$$

are almost-everywhere differentiable in the original input  $\mathbf{x}_0$ . This completes the proof.  $\square$

### Proof of Proposition 4.3

*Proof.* Let  $\mathbf{z} \in [0, 1]^n$  and  $\mathbf{x} = s\tilde{\mathbf{z}} + \mathbf{u}$ , and define

$$\mu = \frac{1}{n} \sum_{i=1}^n z_i, \quad \tilde{\mathbf{z}} = \mathbf{z} - \mu \mathbf{1}, \quad \mathbf{u} = \frac{k}{n} \mathbf{1}.$$

Since  $\sum_i \tilde{z}_i = \sum_i (z_i - \mu) = 0$ , we have

$$\sum_{i=1}^n x_i = s \sum_{i=1}^n \tilde{z}_i + \sum_{i=1}^n u_i = 0 + k,$$

so  $\|\mathbf{x}\|_1 = k$ . Next, for each coordinate

$$x_i = s(z_i - \mu) + \frac{k}{n}.$$

Because  $0 \leq z_i \leq 1$ , we have  $-\mu \leq z_i - \mu \leq 1 - \mu$ . Therefore

$$x_i \geq -s\mu + \frac{k}{n} = \frac{k}{n} \left(1 - s \frac{n\mu}{k}\right) \geq 0$$

by  $s \leq \frac{k}{n\mu}$ , and

$$x_i \leq s(1 - \mu) + \frac{k}{n} = 1 - \frac{n-k}{n} \left(1 - s \frac{n(1-\mu)}{n-k}\right) \leq 1$$

by  $s \leq \frac{n-k}{n(1-\mu)}$ . Hence  $0 \leq x_i \leq 1$  for all  $i$ , and we conclude  $\mathbf{x} \in \Delta_{n,k}$ .  $\square$

## E Case study: Partition Matroids and Spanning Trees

### E.1 Partition Matroid

Partition matroids provide a powerful and flexible framework for modeling constraints in set function optimization problems. They capture scenarios where elements are divided into categories, and we are allowed to select only a limited number from each category — a structure that arises naturally in many real-world applications. This structure naturally arises in applications such as sensor placement, where sensors are partitioned by geographic regions and each region has an independent budget [46]; job allocation and welfare maximization, where tasks are categorized by required skills and only a bounded number of tasks from each skill category can be assigned [10, 85]; and many other

834 theoretical and practical settings [22, 13, 38]. Partition matroids thus provide a flexible abstraction  
 835 for modeling structured selection problems with heterogeneous constraints.

836 A partition matroid or partitional matroid is a matroid that is a direct sum of uniform matroids. It  
 837 is defined over a ground set in which the elements are partitioned into different categories. For  
 838 each category, there is a cardinality constraint—a maximum number of allowed elements from this  
 839 category. Formally, let  $V_1, \dots, V_c$  be disjoint subsets such that  $V = \cup_{i=1}^d V_i$ . Let  $k_i$  be integers with  
 840  $0 \leq k_i \leq |V_i|$ . Consider the following combinatorial optimization problem:

$$\max_{S: |S \cap V_i| = k_i} f(S). \quad (13)$$

841 Note that when  $c = 1$ , this reduces to the cardinality case. The convex polytope of feasible solutions  
 842 is known as the partition matroid base polytope and is described as follows:

$$\mathcal{B} = \left\{ \mathbf{x} : \forall S \subseteq E \sum_{e \in S} \mathbf{x}(e) \leq r(S), \text{ and } \|\mathbf{x}\|_1 = \sum_{i=1}^c k_i \right\} \quad (14)$$

$$r(S) = \sum_{i=1}^c \min(|S \cap V_i|, k_i) \quad \forall S \subseteq E. \quad (15)$$

843 The vertices of the matroid base polytope  $\mathcal{B}$  are the indicator vectors of sets whose intersection with  
 844 every block  $V_i$  has size exactly  $k_i$ . Hence, any vector  $\mathbf{x} \in \mathcal{B}$  can be written as a convex combination of  
 845 the indicator vectors of feasible sets. We prove that Algorithm 2, given  $\mathbf{x} \in \mathcal{B}$ , returns in polynomial  
 846 time a distribution over feasible sets which is continuous and differentiable with respect to  $\mathbf{x}$ . Note  
 847 that Algorithm 2 is an explicit version of our generic Algorithm 1, with steps 3  
 848 and 4 specified.

849 **Theorem E.1.** *Given  $\mathbf{x} \in \mathcal{B}$ , Algorithm 2 terminates after at most  $O(n)$  iterations and returns*  
 850  *$\{(p_{\mathbf{x}_t}(S_t), S_t)\}$  such that for every  $S_t$  and  $V_i$  we have  $|S_t \cap V_i| = k_i$ , and  $\sum_t p_{\mathbf{x}_t}(S_t) = 1$  with*  
 851  *$0 \leq p_{\mathbf{x}_t}(S_t) \leq 1$ . Moreover, each  $p_{\mathbf{x}_t}(S_t)$  is a continuous and differentiable function of  $\mathbf{x}$ .*

852 *Proof of Theorem E.1.* Suppose  $\mathbf{x}_0 = \mathbf{x} \in \mathcal{B}$ . We prove the correctness of our algorithm for every  
 853 iteration  $t$ . To obtain a vertex of the polytope in the support of  $\mathbf{x}_t$ , we set

$$\mathbf{1}_{S_t} = \underset{\mathbf{y} \in \{0,1\}^n, \|\mathbf{y}(V_i)\|_1 = k_i}{\operatorname{argmax}} \quad \mathbf{x}_t^\top \mathbf{y}$$

854 The optimal solution for the above problem is  $S_t = \cup_{i=1}^c T_i$  where for each block  $V_i$ ,  $T_i$  is the indices  
 855 of the top  $k_i$  coordinates within  $\mathbf{x}_t(V_i)$ . Define

$$a_t = \min \left\{ \min_{i \in S_t} \mathbf{x}_t(i), 1 - \max_{i \notin S_t} \mathbf{x}_t(i) \right\}, \text{ and} \quad (16)$$

$$\mathbf{x}_{t+1} = \frac{1}{1-a_t} (\mathbf{x}_t - a_t \mathbf{1}_{S_t}) \quad (17)$$

856 For the correctness of Algorithm 2 it suffices to show  $\mathbf{x}_{t+1}$  is in fact inside the matroid base polytope  
 857  $\mathcal{B}$ .

858 First, note that  $\mathbf{x}_{t+1} \in [0, 1]^n$  by the definition of  $a_t$  and the fact that  $\mathbf{x}_t \in [0, 1]^n$ . Second, for both  $\mathbf{x}_t$   
 859 and  $\mathbf{1}_{S_t}$ , we have  $\|\mathbf{x}\|_1 = \|\mathbf{1}_{S_t}\|_1 = \sum_{i=1}^c k_i$ . Hence, by the definition  $\mathbf{x}_t = a_t \mathbf{1}_{S_t} + (1 - a_t) \mathbf{x}_{t+1}$ ,  
 860 it follows that  $\|\mathbf{x}_{t+1}\|_1 = \sum_{i=1}^c k_i$ . It remains to show for all  $S \subseteq V$  it holds that  $\sum_{e \in S} \mathbf{x}_{t+1}(e) \leq$   
 861  $r(S)$ . Recall that  $r(S) = \sum_{i=1}^c \min(|S \cap V_i|, k_i)$  and

$$\sum_{e \in S} \mathbf{x}_{t+1}(e) = \sum_{e \in S \cap V_1} \mathbf{x}_{t+1}(e) + \dots + \sum_{e \in S \cap V_c} \mathbf{x}_{t+1}(e) \quad (18)$$

862 We show each term  $\sum_{e \in S \cap V_i} \mathbf{x}_{t+1}(e) \leq \min(|S \cap V_i|, k_i)$ . First suppose  $\min(|S \cap V_i|, k_i) = |S \cap V_i|$ .  
 863 Then since  $\mathbf{x}_{t+1}(e) \in [0, 1]$  we have  $\sum_{e \in S \cap V_i} \mathbf{x}_{t+1}(e) \leq \sum_{e \in S \cap V_i} 1 = |S \cap V_i|$ . Second, suppose  
 864  $\min(|S \cap V_i|, k_i) = k_i$ . Note  $\sum_{e \in S \cap V_i} \mathbf{x}_{t+1}(e) \leq \sum_{e \in V_i} \mathbf{x}_{t+1}(e)$ , hence it suffices to show  
 865  $\sum_{e \in V_i} \mathbf{x}_{t+1}(e) \leq k_i$ .

866 In this case we use the induction hypothesis that  $\mathbf{x}_t \in \mathcal{B}$ .  $\mathbf{x}_t$  being in  $\mathcal{B}$  implies that  $\sum_{e \in E_i} \mathbf{x}(e) \leq$   
867  $r(V_i) = k_i$ . By definition we have

$$a_t \sum_{e \in S \cap V_i} \mathbf{1}_{S_t}(e) + (1 - a_t) \sum_{e \in S \cap V_i} \mathbf{x}_{t+1}(e) = \sum_{e \in S \cap V_i} \mathbf{x}_t(e) \leq k_i \quad (19)$$

$$\Rightarrow a_t |S_t \cap V_i| + (1 - a_t) \sum_{e \in S \cap V_i} \mathbf{x}_{t+1}(e) \leq k_i \quad (20)$$

$$\Rightarrow a_t k_i + (1 - a_t) \sum_{e \in S \cap V_i} \mathbf{x}_{t+1}(e) \leq k_i \quad (|S_t \cap V_i| = k_i \text{ by the choice of } S_t)$$

$$\Rightarrow (1 - a_t) \sum_{e \in S \cap V_i} \mathbf{x}_{t+1}(e) \leq (1 - a_t) k_i \quad (21)$$

$$\Rightarrow \sum_{e \in S \cap V_i} \mathbf{x}_{t+1}(e) \leq k_i \quad (22)$$

868 This finishes the proof that  $\sum_{e \in S} \mathbf{x}_{t+1}(e) \leq r(S)$ , thus  $\mathbf{x}_{t+1} \in \mathcal{B}$ .

869 Algorithm 2 terminates in at most  $O(n)$  iterations. At each iteration  $t$ ,  $\mathbf{x}_{t+1}$  differs from  $\mathbf{x}_t$  by fixing  
870 one additional coordinate to either 0 or 1. Once a coordinate is fixed to 0/1, it remains unchanged in  
871 all future iterates. The process terminates when  $\mathbf{x}_t$  has  $n - \sum_{i=1}^c k_i$  zeros and  $\sum_{i=1}^c k_i$  ones, meaning  
872 all coordinates are 0/1.

873 Finally, because each  $a_t$  is defined via pointwise minima and maxima of the entries of  $\mathbf{x}_t$ , it is almost  
874 everywhere differentiable in  $\mathbf{x}_t$ . By the chain rule, the resulting probability weights

$$p_{\mathbf{x}_t}(S_t) = a_t \prod_{i < t} (1 - a_i)$$

875 are almost-everywhere differentiable in the original input  $\mathbf{x}_0$ . This completes the proof.

876 □

---

#### Algorithm 2 Decomposition for partition matroid

---

**Require:**  $\mathbf{x} \in \mathcal{B}$ .

1:  $\mathbf{x}_0 \leftarrow \mathbf{x}$

2: **repeat**

3:  $\mathbf{1}_{S_t} = \operatorname{argmax}_{\mathbf{y} \in \{0,1\}^n, \|\mathbf{y}(V_i)\|_1 = k_i} \mathbf{x}_t^\top \mathbf{y}$

4:  $a_t = \min \{ \min_{i \in S_t} \mathbf{x}(i), 1 - \max_{i \notin S_t} \mathbf{x}(i) \}$

5:  $\mathbf{x}_{t+1} \leftarrow (\mathbf{x}_t - a_t \mathbf{1}_{S_t}) / (1 - a_t)$

6:  $p_{\mathbf{x}_t}(S_t) \leftarrow a_t \prod_{i=0}^{t-1} (1 - a_i)$

7:  $t \leftarrow t + 1$

8: **until**  $\mathbf{x}_t \in \{0,1\}^n$

9: **return** All  $\{(p_{\mathbf{x}_t}(S_t), S_t)\}$  pairs.

---

### 877 E.1.1 Generating Neural Predictions in the Partition Matroid Base Polytope

878 Similar to the cardinality constraint case, we need to massage the output of neural network in a  
879 differentiable and computationally efficient way so that it can be passed to Algorithm 2. The general  
880 idea is similar to the one we proposed in Section 4.2.1, however it requires a more careful way of  
881 dealing with blocks.

882 **Proposition E.2** (Block-wise scaling into a partitioned simplex). *Let the index set  $[n] = \{1, \dots, n\}$*   
883 *be partitioned into disjoint blocks  $V_1, \dots, V_c$  with  $|V_i| = n_i$  and  $\sum_{i=1}^c n_i = n$ . Given any vector*  
884  *$\mathbf{z} \in [0, 1]^n$ , set*

$$m_i := \frac{1}{n_i} \sum_{e \in V_i} \mathbf{z}(e), \quad \mathbf{m}(e) := m_i \ (e \in V_i), \quad \mathbf{u}(e) := \frac{k_i}{n_i} \ (e \in V_i),$$

885

$$s_i := \min\left(\frac{k_i/n_i}{m_i}, \frac{(n_i-k_i)/n_i}{1-m_i}\right), \quad \mathbf{s}(e) := s_i \ (e \in V_i),$$

886 and define

$$\mathbf{x} := \mathbf{s} \odot (\mathbf{z} - \mathbf{m}) + \mathbf{u}.$$

887 Then  $\mathbf{x} \in \mathcal{B}$ ; that is, every coordinate of  $\mathbf{x}$  lies in  $[0, 1]$  and each block  $V_i$  has the prescribed sum  $k_i$ .888 *Proof.* For each block  $V_i$  and every  $e \in V_i$  we have

$$\mathbf{x}(e) = s_i(\mathbf{z}(e) - m_i) + \frac{k_i}{n_i}.$$

889 Since  $\sum_{e \in V_i} (\mathbf{z}(e) - m_i) = 0$ , summing over  $V_i$  gives

$$\sum_{e \in V_i} \mathbf{x}(e) = k_i.$$

890 Because  $-m_i \leq \mathbf{z}(e) - m_i \leq 1 - m_i$ ,

$$\mathbf{x}(e) \geq \frac{k_i}{n_i} - s_i m_i, \quad \mathbf{x}(e) \leq \frac{k_i}{n_i} + s_i(1 - m_i).$$

891 By the definition  $s_i = \min(\frac{k_i/n_i}{m_i}, \frac{(n_i-k_i)/n_i}{1-m_i})$  both right-hand sides lie in  $[0, 1]$ , so  $0 \leq \mathbf{x}(e) \leq 1$ .892 Thus every block sums to  $k_i$  and every coordinate is in  $[0, 1]$ ; hence  $\mathbf{x} \in \mathcal{B}$ .  $\square$ 893 **E.2 Graphical Matroid**

894 In this subsection we turn our attention to *graphical matroids* and show that our framework can be  
 895 extended beyond cardinality constraints. Graphical matroids are core combinatorial objectives that  
 896 have been studied for decades in combinatorial optimization. Some of the most basic combinatorial  
 897 problems such as finding a minimum spanning tree in a connected graph to more complex problems  
 898 like "does a graph  $G$  contain  $k$  disjoint spanning trees?" which appears in many applications in  
 899 Network Theory.

900 Let  $G = (V, E)$  be a graph with  $n$  nodes and  $m$  edges. The type of optimization problems that we  
 901 consider here are expressed as follows

$$\max_{S \subseteq E: S \in \mathcal{F}} f(S) \tag{23}$$

902 where  $\mathcal{F}$  denotes the set of full *spanning forests* of  $G$ . We focus on the convex hull formed by the  
 903 feasible sets edges in  $\mathcal{F}$ . That is, let  $\mathbf{1}_T$  be the indicator vector of  $T \in \mathcal{F}$  and define

$$\mathcal{B}(G) = \text{conv}\{\mathbf{1}_T : T \in \mathcal{F}\} \tag{24}$$

904 The combinatorial object  $\mathcal{B}(G)$  is known as the *graphical matroid base polytope*. For any set of edges  
 905 let  $\text{rank}(S) = n - c(S)$  where  $c(S)$  is the number of connected components of the subgraphs formed  
 906 by the edges in  $S$ . For instance, if  $G$  is connected and  $S$  forms a spanning tree then  $\text{rank}(S) = n - 1$ .  
 907 It is known that  $\mathcal{B}(G)$  can be defined in an equivalent way as follows

$$\mathcal{B}(G) = \{\mathbf{x} \in [0, 1]^m : \forall S \subseteq E, \sum_{e \in S} \mathbf{x}(e) \leq \text{rank}(S), \text{ and } \|\mathbf{x}\|_1 = n - c(V)\} \tag{25}$$

908 Note that any vector  $\mathbf{x} \in \mathcal{B}(G)$  can be written as a convex combination of the indicator vectors of  
 909 feasible sets i.e, indicator vectors of spanning forests. We prove that Algorithm 3, given  $\mathbf{x} \in \mathcal{B}(G)$ ,  
 910 returns in polynomial time a distribution over feasible sets  $\mathcal{F}$  which is continuous and differentiable  
 911 with respect to  $\mathbf{x}$ . The algorithm is essentially the same as what we have seen for the cardinality case,  
 912 the only difference is on selecting a proper extreme vertex of the polytope in each step.

913 **Theorem E.3.** *Given  $\mathbf{x} \in \mathcal{B}(G)$ , Algorithm 3 terminates after at most  $O(m)$  iterations and returns*  
 914  *$\{(p_{\mathbf{x}_t}(S_t), S_t)\}$  such every  $S_t$  corresponds to a spanning forest in  $G$  and  $\sum_t p_{\mathbf{x}_t}(S_t) = 1$  with*  
 915  *$p_{\mathbf{x}_t}(S_t) \in [0, 1]$ . Moreover, each  $p_{\mathbf{x}_t}(S_t)$  is a continuous and differentiable function of  $\mathbf{x}$ .*



---

**Algorithm 3** Decomposition for graphical matroid

---

**Require:** Graph  $G = (V, E)$  and  $\mathbf{x} \in \mathcal{B}(G)$ .

```

1:  $\mathbf{x}_0 \leftarrow \mathbf{x}$ 
2: repeat
3:    $S_t \leftarrow$  A maximum spanning forest using  $\mathbf{x}_t$  as the weights for edges (treat zero entries as
      non-edges.)
4:    $a_t = \min \{ \min_{i \in S_t} \mathbf{x}(i), 1 - \max_{i \notin S_t} \mathbf{x}(i) \}$ 
5:    $\mathbf{x}_{t+1} \leftarrow (\mathbf{x}_t - a_t \mathbf{1}_{S_t}) / (1 - a_t)$ 
6:    $p_{\mathbf{x}_t}(S_t) \leftarrow a_t \prod_{i=0}^{t-1} (1 - a_i)$ 
7:    $t \leftarrow t + 1$ 
8: until  $\mathbf{x}_t \in \{0, 1\}^n$ 
9: return All  $\{(p_{\mathbf{x}_t}(S_t), S_t)\}$  pairs.

```

---

916 *Proof.* Without loss of generality and better exposure, we assume  $G$  is a connected graph. All of  
 917 the arguments here can be extended to graphs that are not connected in a straightforward way. We  
 918 hence continue by assuming  $G$  is connected thus  $\|\mathbf{x}\|_1 = n - c(V) = n - 1$  for  $\mathbf{x} \in \mathcal{B}(G)$ . For the  
 919 correctness of algorithm it suffices to prove the correctness of one iteration of Algorithm 3. We focus  
 920 on one iteration.

921 Let  $S_t$  be the maximum spanning tree returned by the Kruskal's algorithm using  $\mathbf{x}_t$  as the weights for  
 922 edges (treat zero entries as non-edges.)<sup>1</sup>. Note that  $\mathbf{1}_{S_t}$  is in fact an extreme vertex of the polytope  
 923  $\mathcal{B}(G)$ . Define

$$a_t = \min \left\{ \min_{e \in S_t} \mathbf{x}_t(e), 1 - \max_{e \notin S_t} \mathbf{x}_t(e) \right\}, \text{ and} \quad (26)$$

$$\mathbf{x}_{t+1} = \frac{1}{1-a_t} (\mathbf{x}_t - a_t \mathbf{1}_{S_t}) \quad (27)$$

924 For the correctness of Algorithm 3 it suffices to show  $\mathbf{y}$  is in fact inside the matroid base polytope  
 925  $\mathcal{B}(G)$ .

926 First, note that  $\mathbf{x}_{t+1} \in [0, 1]^n$  by the definition of  $a_t$  and the fact that  $\mathbf{x}_t \in [0, 1]^n$ . Second, for both  
 927  $\mathbf{x}_t$  and  $\mathbf{1}_{S_t}$ , we have  $\|\mathbf{x}\|_1 = \|\mathbf{1}_{S_t}\|_1 = n - 1$  since  $S_t$  is a spanning tree and must have  $n - 1$  edges.  
 928 Hence, by the convex combination  $\mathbf{x}_t = a_t \mathbf{1}_{S_t} + (1 - a_t) \mathbf{x}_{t+1}$ , it follows that  $\|\mathbf{x}_{t+1}\|_1 = n - 1$ . It  
 929 remains to show for all  $S \subseteq E$  it holds that  $\sum_{e \in S} \mathbf{x}_{t+1}(e) \leq \text{rank}(S)$ . Recall that  $r(S) = n - c(S)$   
 930 where  $c(S)$  is the number of connected components in the graph induced by the edges in  $S$ . We  
 931 consider the following cases and prove for each case  $\sum_{e \in S} \mathbf{x}_{t+1}(e) \leq \text{rank}(S)$ .

932 **Case 1:  $S$  is a spanning tree.** In this case  $\text{rank}(S) = n - 1$  since  $G$  is connected and  $|S| = n - 1$   
 933 since  $S$  is a spanning tree. Therefore,  $\sum_{e \in S} \mathbf{x}_{t+1}(e) \leq |S| = n - 1 = \text{rank}(S)$ .

934 **Case 2:  $S$  induces a forest.** In this case every connected component of the graph induced by  $S$  is a  
 935 tree. We count an isolated vertex as a tree. Let  $c_1, \dots, c_k, k = C(S)$  be the connected components  
 936 induced by  $S$  where each of these components is a tree, namely,  $S_1, \dots, S_k$ . Note that  $S_i \cap S_j = \emptyset$   
 937 for  $i \neq j$  and the number of nodes in each connected component is  $n_i = |S_i| + 1$ .

$$\sum_{e \in S} \mathbf{x}_{t+1}(e) = \sum_{e \in S_1} \mathbf{x}_{t+1}(e) + \dots + \sum_{e \in S_k} \mathbf{x}_{t+1}(e) \quad (28)$$

$$\leq |S_1| + \dots + |S_k| \quad (29)$$

$$= (n_1 - 1) + \dots + (n_k - 1) = n - c(S) = \text{rank}(S). \quad (30)$$

938 **Case 3:  $S$  induces one connected component which is not a tree.** In this case  $\text{rank}(S) = n - 1$ ,  
 939 however  $|S| > n - 1$  since  $S$  does not induce a tree. Recall that every  $0 \leq \mathbf{x}_{t+1}(e) \leq 1$ . Hence,  
 940  $\sum_{e \in S} \mathbf{x}_{t+1}(e) \leq \sum_{e \in E} \mathbf{x}_{t+1}(e) \leq n - 1 = \text{rank}(S)$ .

---

<sup>1</sup>Kruskal's algorithm is generally used for finding minimum spanning tree, however a slight modification can give us a maximum spanning tree.

941 **Case 4:  $S$  induces several connected components some of which are tree and some are not.**  
 942 This is a mix of Case 2 and Case 3. Let  $T_1, \dots, T_{k_1}$  be the connected components induced by  $S$   
 943 that are tree (isolated vertices are considered as trees); let  $S_1, \dots, S_{k_2}$  be the induced connected  
 944 components that are not tree. Note that  $\text{rank}(S) = n - k_1 - k_2$ .

945 Let let  $n(T_i)$  denotes the number of nodes in the connected subgraph  $T_i$  i.e.,  $n(T_i) = |T_i| + 1$ . Using  
 946 the same argument as Case 2 we have

$$\sum_{e \in T_1} \mathbf{x}_{t+1}(e) + \dots + \sum_{e \in T_{k_1}} \mathbf{x}_{t+1}(e) \leq |T_1| + \dots + |T_{k_1}| \quad (31)$$

$$= (n(T_1) - 1) + \dots + (n(T_{k_1}) - 1) = \sum_{i=1}^{k_1} n(T_i) - k_1 \quad (32)$$

947 Moreover, let  $n(S_i)$  denotes the number of nodes in the connected subgraph  $S_i$ .

$$\sum_{e \in S_1} \mathbf{x}_t(e) + \dots + \sum_{e \in S_{k_2}} \mathbf{x}_t(e) = \sum_{e \in I \cap (\cup_{i=1}^{k_2} S_i)} \mathbf{x}_t(e) + \sum_{e \notin I \cap (\cup_{i=1}^{k_2} S_i)} \mathbf{x}_t(e) \quad (33)$$

$$\leq |S_t \cap (\cup_{i=1}^{k_2} S_i)| + (1 - a_t) \left( \sum_{i=1}^{k_2} |S_i| - |S_t \cap (\cup_{i=1}^{k_2} S_i)| \right) \quad (34)$$

$$= |S_t \cap (\cup_{i=1}^{k_2} S_i)| + (1 - a_t) \sum_{i=1}^{k_2} |S_i| - (1 - a_t) \left( |S_t \cap (\cup_{i=1}^{k_2} S_i)| \right) \quad (35)$$

$$= a_t |S_t \cap (\cup_{i=1}^{k_2} S_i)| + (1 - a_t) \sum_{i=1}^{k_2} |S_i| \quad (36)$$

948 where the last inequality is because  $\mathbf{x}_t(e) \leq 1 - a_t$  for  $e \notin S_t \cap (\cup_{i=1}^{k_2} S_i)$ . By definition

$$\sum_{e \in S_1} \mathbf{x}_{t+1}(e) + \dots + \sum_{e \in S_{k_2}} \mathbf{x}_{t+1}(e) = \frac{1}{1 - a_t} \left( \sum_{e \in S_1} \mathbf{x}_t(e) + \dots + \sum_{e \in S_{k_2}} \mathbf{x}_t(e) - a_t |S_t \cap (\cup_{i=1}^{k_2} S_i)| \right) \quad (37)$$

$$\leq \frac{1}{1 - a_t} \left( a_t |S_t \cap (\cup_{i=1}^{k_2} S_i)| + (1 - a_t) \sum_{i=1}^{k_2} |S_i| - a_t |S_t \cap (\cup_{i=1}^{k_2} S_i)| \right) \quad (38)$$

$$= \sum_{i=1}^{k_2} |S_i| = \sum_{i=1}^{k_2} n(S_i) - k_2 \quad (39)$$

949 Putting (32) and (39) together yields

$$\sum_{e \in S} \mathbf{x}_{t+1}(e) = \sum_{e \in T_1} \mathbf{x}_{t+1}(e) + \dots + \sum_{e \in T_{k_1}} \mathbf{x}_{t+1}(e) + \sum_{e \in S_1} \mathbf{x}_{t+1}(e) + \dots + \sum_{e \in S_{k_2}} \mathbf{x}_{t+1}(e) \quad (40)$$

$$\leq \sum_{i=1}^{k_1} n(T_i) - k_1 + \sum_{i=1}^{k_2} n(S_i) - k_2 \quad (41)$$

$$= n - k_1 - k_2 = n - c(S) = \text{rank}(S). \quad (42)$$

950 This finishes the proof that  $\sum_{e \in S} \mathbf{x}_{t+1}(e) \leq \text{rank}(S)$ , thus  $\mathbf{x}_{t+1} \in \mathcal{B}(G)$ .

951 The proof of termination, continuity and a.e. differentiability is almost identical to the proof of  
 952 Theorem E.1.  $\square$

## E.2.1 Generating neural predictions in the Graphical Base Matroid

We need to massage the output of the neural network in a differentiable and computationally efficient way so that it obeys a relaxed constraint and can be passed to Algorithm 3. Algorithm 3 requires  $\mathbf{x}$  to lie within the graphical matroid base polytope  $\mathcal{B}(G)$ , which represents a relaxed version of the original constraints. Without loss of generality we assume  $G$  is a connected graph. Every point inside the graphical matroid base polytope can be seen as a distribution over spanning trees. We first define the uniform distribution over the set of all spanning trees and forces our encoder network to generate a perturbation to this uniform distribution. Some notations are in order.

Fix an arbitrary orientation over the edges of  $G$ . For an edge  $e = (u, v)$ , i.e., oriented from  $u$  to  $v$ , let

$$b_e = \mathbf{1}_u - \mathbf{1}_v \text{ with } \mathbf{1}_u(v) = \begin{cases} 1 & \text{if } v = u \\ 0 & \text{otherwise} \end{cases} \quad (43)$$

The Laplacian of (positively) weighted graph  $G$  is  $L_G = \sum_{e \in E} w(e) b_e b_e^\top$ . Let  $L_G^\dagger$  denote the Moore–Penrose pseudo-inverse of  $L_G$ .

**Generating a perturbation vector.** Let  $\mathcal{T}$  denote the set of all spanning trees of  $G$  and  $\mu$  be a uniform distribution of all spanning trees of  $G$ . A uniform spanning tree distribution is a uniform distribution over all spanning trees of a given graph. If the graph is weighted, then we can study the weighted uniform distribution of spanning trees where the probability of each tree is proportional to the product of the weight of its edges. For  $w : E \rightarrow \mathbb{R}_+$ , we say  $\mu(w)$  is a  $w$ -uniform spanning tree distribution, if for any spanning tree  $T \in \mathcal{T}$ ,

$$\Pr[T] \propto \prod_{e \in T} w(e).$$

Let  $\mu_e(w) := \Pr_T \sim \mu[e \in T]$  be the marginal probability of edge  $e$ . The following result gives us a way of writing an analytical expression for  $\mu_e$ .

**Theorem E.4 ([80]).** *For any edge  $e$*

$$\mu_e = b_e^\top L_G^\dagger b_e.$$

*Moreover, for weighted graph  $G$  with  $w : E \rightarrow \mathbb{R}_+$ , if  $w(e)$  is the weight of  $e$ , then*

$$\mu_e(w) = w(e) b_e^\top L_G^\dagger b_e.$$

The above Theorem E.4 suggests the following way of generating a point inside the graphical matroid base polytope. Let  $w \in \mathbb{R}_+^E$  be the output of an encoder network that assigns a positive weight to every edge of graph  $G$ . We think of  $w$  as a perturbation to the uniform distribution over the spanning trees. Then obtain vector  $\mathbf{x}$  whose  $e$ -th entry is  $\mu_e(w)$  according to the weight vector  $w$  and Theorem E.4. The vector  $\mathbf{x}$  lies inside the graphical matroid base polytope  $\mathcal{B}(G)$ . Recall that  $\mathcal{B}(G) = \text{conv}\{\mathbf{1}_T : T \in \mathcal{T}\}$  and  $\mathbf{x} = \mathbb{E}_{T \sim \mu(w)}[\mathbf{1}_T]$  is a convex combination of indicator vector of the spanning trees. It remain to show that  $\mu(w)$  is continuous and differential with respect to  $w$ .

**Theorem E.5.** *Let  $G = (V, E, w)$  be a connected, weighted graph with non-negative edge weights  $w : E \rightarrow \mathbb{R}_{\geq 0}$  and let*

$$\mu_e(w) = \mathbb{P}_{T \sim \mu(w)}[e \in T] = w(e) b_e^\top L_G^\dagger(w) b_e, \quad e \in E,$$

*where  $b_e$  is the signed incidence vector of  $e$  and  $L_G(w) = \sum_{f \in E} w(f) b_f b_f^\top$  is the weighted Laplacian (with Moore–Penrose pseudoinverse  $L_G^\dagger$ ). Then*

- i.  $\mu_e : \mathbb{R}_{\geq 0}^E \rightarrow \mathbb{R}$  is continuous on the closed orthant;
- ii.  $\mu_e$  is  $C^\infty$  (indeed analytic) on the open orthant  $\mathbb{R}_{> 0}^E$ ;
- iii.  $\mu_e$  is differentiable everywhere on  $\mathbb{R}_{\geq 0}^E$ .

*Proof.* Let  $\tilde{L}_G(w)$  denotes the reduced Laplacian with any single row/column removed. By Kirchhoff’s Matrix–Tree Theorem [40] we have

$$\tau(w) = \det(\tilde{L}_G(w)) = \sum_{\text{spanning trees } T} \prod_{f \in T} w(f),$$

990 For an edge  $e$  we have,

$$\mu_e(w) = 1 - \frac{\tau(w - e)}{\tau(w)} \quad (44)$$

991 where  $w - e$  denotes the weight vector with  $w(e) = 0$ . Both numerator and denominator in (44) are  
 992 (multivariate) polynomials; moreover  $\tau(w) > 0$  whenever at least one spanning tree has positive total  
 993 weight, which is guaranteed by the connectivity of  $G$ . Hence the ratio is continuous on  $\mathbb{R}_{\geq 0}^E$ , proving  
 994 part (i).

995 On the interior  $\mathbb{R}_{> 0}^E$  the reduced Laplacian  $\tilde{L}_G(w)$  is positive definite (PD). The maps

$$w \mapsto \tilde{L}_G(w) \quad (\text{affine map}), \quad A \mapsto A^{-1} \quad (C^\infty \text{ on PD}),$$

996 compose smoothly, so the formula  $\mu_e(w) = w(e) b_e^\top \tilde{L}_G(w)^{-1} b_e$  is infinitely differentiable i.e., is  
 997  $C^\infty$  and indeed real-analytic on  $\mathbb{R}_{> 0}^E$ , giving (ii).

998 It remains to show (iii) at boundary points where some coordinates of  $w$  equal 0. Let  $w_0$  be a weight  
 999 vector with at least one zero entry, and  $Z$  be the set of zero weight edges. There are two cases:

1000 Case A:  $G - Z$  is connected. In this case the reduced Laplacian  $\tilde{L}_G(w_0)$  positive definite since  $G - Z$   
 1001 has at least one spanning tree, so the same smoothness argument used for (ii) applies; thus  $\mu_e(w_0)$  is  
 1002 differentiable (in fact is  $C^\infty$ ).

1003 Case B:  $G - Z$  is disconnected. Then every spanning tree of any nearby weight vector must contain  
 1004 the cut-edge whose weight vanished, so the term in Equation (44) equals 1 in a whole neighbourhood;  
 1005 hence  $\mu_e$  is locally constant and therefore differentiable at  $w_0$  with derivative 0.

1006 In either case one-sided (classical) derivatives exist and coincide with the interior derivative, complet-  
 1007 ing (iii).  $\square$

## 1008 F Case study: Maximum Independent Set

1009 For the maximum independent set problem, we want to find the largest set  $S$  of nodes in a graph  
 1010  $G = (V, E)$ , where no pair of nodes in the set is adjacent. Unfortunately, there is no known compact  
 1011 description in terms of inequalities for the independent set polytope [55]. This automatically calls  
 1012 into question whether there is a consistent decomposition that can be designed.

1013 First, let us assume that  $\emptyset \in \mathcal{C}$ , and that the graph  $G$  has no isolated nodes. In order to be able to  
 1014 optimize over independent sets we are going to need access to a polytope description. The constraints  
 1015  $x_i \geq 0$  and  $x_i + x_j \leq 1$  are defining the polytope referred to in the literature as FSTAB [55]. FSTAB  
 1016 is a relaxation of the independent set polytope since it includes half-integral vertices. We will explain  
 1017 how we will leverage FSTAB to explore the space of independent sets.

1018 For step 3 we use Equation (8) to obtain a vertex of the polytope FSTAB. For convenience, let  
 1019 us call this vertex  $\mathbf{v}_t$ . The  $i$ -th coordinate of  $\mathbf{v}_t$  is denoted by  $v_{t,i}$ . Note that now the vertex may  
 1020 contain half-coordinates. This will affect our coefficient selection. We need to select a coefficient  
 1021 that does not violate the polytope inequalities. The constraints  $0 \leq \mathbf{x} \leq 1$  imply the same rule for the  
 1022 coefficient  $a_t$ . However, we have an additional consideration. If we just choose the coefficients as in  
 1023 the cardinality constraint case, when the coordinates  $i, j \notin S$  and  $(i, j) \in E$  get rescaled by  $1 - a_t$ ,  
 1024 we may break the constraint for  $x_i + x_j \leq 1$ . This leads us to the following rule:

$$a_t = \min \left\{ \min_{i: v_{t,i} > 0} \frac{x_i^{(t-1)}}{v_{t,i}}, \min_{j: v_{t,j} < 1} \frac{1 - x_j^{(t-1)}}{1 - v_{t,j}}, \min_{\substack{(u,v) \in E \\ v_{t,u} = v_{t,v} = 0}} (1 - x_u^{(t-1)} - x_v^{(t-1)}) \right\}. \quad (45)$$

1025 **Proposition F.1.** *The algorithm on FSTAB using coefficients from Equation (45) and Equation (8)*  
 1026 *for step 3, obtains a decomposition in at most  $n + |E|$  steps.*

1027 *Proof.* At each step, a coordinate is either 0, 1, or an inequality is tightened. Once any of those events  
 1028 happens, they cannot be undone. If all inequalities are tightened, then we are done. This can take at  
 1029 most  $|E|$  steps. Similarly it requires at most  $n$  steps if all coordinates are set to 0 or 1. Therefore, the  
 1030 algorithm will terminate in at most  $n + |E|$  steps.  $\square$

1031 **Obtaining a point on FSTAB.** Since we would like to build a support that avoids half-integral points  
 1032 as much as possible we follow a simple gradient-based projection scheme for FSTAB. We begin by  
 1033 defining the total edge-violation of a point  $\mathbf{x} \in \mathbb{R}^n$  with slack parameter  $s \geq 0$  as

$$V(\mathbf{x}) = \sum_{(u,v) \in E} \max\{0, x_u + x_v + s - 1\},$$

1034 which measures how much each edge  $(u, v)$  exceeds the bound  $x_u + x_v + s \leq 1$ . To correct all  
 1035 violations at once, we compute  $\nabla V(\mathbf{x}) = (d_1, \dots, d_n)$ , where

$$d_i = \sum_{\{j: (i,j) \in E\}} \mathbf{1}[x_i + x_j + s - 1 > 0]$$

1036 counts how many incident edges on node  $i$  are violated. Next, for each violated edge  $(u, v)$  with  
 1037 violation amount

$$b_{uv} = x_u + x_v + s - 1 > 0,$$

1038 we require a step-size  $\eta$  satisfying  $b_{uv} - \eta(d_u + d_v) \leq 0$ , which implies

$$\eta \geq \frac{b_{uv}}{d_u + d_v}.$$

1039 Taking the maximum of these ratios over all violated edges gives the minimal  $\eta$  that fixes every  
 1040 violation:

$$\eta = \max_{(u,v): x_u + x_v + s > 1} \frac{x_u + x_v + s - 1}{d_u + d_v}.$$

1041 Finally, we compute

$$\mathbf{x}' = \sigma(\mathbf{x} - \eta \nabla V(\mathbf{x})),$$

1042 where  $\sigma$  is a ReLU. This guarantees  $x'_u + x'_v + s \leq 1$  for every  $(u, v) \in E$  and  $\mathbf{x}' \geq 0$ , which  
 1043 ensures that we have a point in FSTAB. However, the decomposition may still yield several half-  
 1044 integral corners which will significantly affect the quality of our extension, since we need the support  
 1045 sets to be independent. The half-integral corners can be reduced by tightening the relaxation and  
 1046 including additional inequalities in the literature including clique constraints and odd cycle constraints  
 1047 [55]. Many of those come down to imposing a l1 norm constraint on some subset of a coordinates  
 1048 corresponding to a subgraph. We may enforce a norm constraint followed by the FSTAB projection.  
 1049 It is easy to see that, if the norm is 1 and the constraints are all satisfied, then we can obtain a  
 1050 decomposition into independent sets. To encourage improved exploration we may project to a larger  
 1051 norm given by a naive bound on the size of the maximum independent set such as  $n/(\Delta + 1)$ , where  
 1052 Delta is the maximum degree. We can then keep reducing the norm/reprojecting to obtain higher  
 1053 quality supports that avoid half-integral corners.

## 1054 G Experiments

1055 Here, we provide detailed experimental settings and some additional experimental results. All the  
 1056 datasets are public and our code is available at [https://anonymous.4open.science/r/Neural\\_](https://anonymous.4open.science/r/Neural_Combinatorial_Optimization_with_Constraints-3485/README.md)  
 1057 [Combinatorial\\_Optimization\\_with\\_Constraints-3485/README.md](https://anonymous.4open.science/r/Neural_Combinatorial_Optimization_with_Constraints-3485/README.md).

1058 **Hardware.** All experiments are run on 16 cores (32 threads) of Intel(R) Xeon(R) Platinum 8268  
 1059 CPU (24 cores, 48 threads in total), 32 GB ram, with a single Nvidia RTX8000 48GB GPU.

1060 **Datasets.** Following previous work [9, 87], we evaluate our methods on both synthetic and real-  
 1061 world bipartite graphs  $(U, V, E)$ ,  $V$  is the ground set and the goal is to select  $k$  nodes from  $V$  so that  
 1062 we cover maximum number of nodes from  $U$ .

- 1063 • **Random Uniform.** The *Random Uniform* datasets include both the Random500 and  
 1064 Random1000 settings, and are used for both training and testing. Each dataset consists of  
 1065 100 independently generated bipartite graphs, where  $|V| = 500$ ,  $|U| = 1000$  (Random500)  
 1066 or  $|V| = 1000$ ,  $|U| = 2000$  (Random1000). Each  $u \in U$  is assigned a weight uniformly  
 1067 at random from 1 to 100. Each  $v \in V$  covers a random subset of  $U$ , with the number of  
 1068 covered nodes for each  $v$  chosen uniformly at random between 10 and 30.



- **Random Pareto.** The Random Pareto dataset consists of 100 independently generated bipartite graphs with  $|U| = |V| = 1000$ , used exclusively for training in the Twitch experiments. In each graph, the number of covered nodes per covering node  $v \in V$  follows a Pareto distribution, with the  $\alpha$  parameter randomly selected between 1 and 2, resulting in a heavy-tailed degree distribution (typically, 20% of covering nodes account for 80% of the edges). Each  $u \in U$  is assigned a weight uniformly at random from 1 to 100, and every  $u \in U$  is covered by at least one  $v \in V$ .
- **Twitch.** The Twitch datasets model social networks of streamers grouped by language, with  $|U| = |V|$  set to the number of streamers. The dataset includes: DE ( $|U| = |V| = 9498$ ), ENGB (7126), ES (4648), FR (6549), PTBR (1912), and RU (4385). The objective is to maximize the sum of logarithmic viewer counts over  $U$ .
- **Railway.** The Railway datasets are derived from real-world Italian railway crew assignments. We evaluate on three graphs: rail507 ( $|V| = 507$ ,  $|U| = 63009$ ), rail516 ( $|V| = 516$ ,  $|U| = 47311$ ), and rail582 ( $|V| = 582$ ,  $|U| = 55515$ ).

**Baselines.** We adopt the same baselines as prior work, including:

- **Random.** Samples  $k$  candidates uniformly at random over multiple trials, selects the best within 240 seconds.
- **Greedy algorithm [61].** Iteratively adds the element with the largest marginal gain, achieving a  $(1 - 1/e)$  approximation.
- **Gurobi.** Exact MIP solver, time-limited to 120 seconds per instance. The version used is Gurobi 12.01.
- **EGN [34].** Optimizes a probabilistic objective with naive rounding; does not guarantee feasibility during optimization.
- **CardNN [87].** One-shot neural solvers for cardinality-constrained problems. Main variants: CardNN-S (Sinkhorn), CardNN-GS (Gumbel-Sinkhorn), CardNN-HGS (Homotopy Gumbel-Sinkhorn). For each, a CardNN-noTTO variant omits test-time optimization.
- **UCOM2 [9].** Combinatorial optimization using greedy incremental derandomization. Three variants differ only by test-time augmentation and running time: UCOM2-short (no augmentation, fastest), UCOM2-middle (moderate augmentation, medium time), UCOM2-long (maximal augmentation, longest time).
- **RL.** For the RL baseline, we follow the instructions in [45, 70] to use GraphSage layers [26] as policy network with Actor-Critic [44] algorithm to train on the same problem instances.

## G.1 Training

To enhance optimization stability and solution quality, we incorporate several training techniques.

A rescaling coefficient in Appendix C.1 is referred to as a *scaling factor*. A set of *scaling factors*  $:[1.0, 0.8, 0.6, 0.4, 0.2, 0.1, 0.05, 0.02, 0.01]$  are used in the training and inference parallelly, helping to get stable decompositions across different data distributions.

An *entropy regularization* term is applied with a cosine-decayed weight  $\lambda_t$ , initialized at 0.05 and annealed to zero by the 30th epoch, promoting exploration within the hypersimplex.

Convergence speed is controlled via a *sharpness factor* applied to the noise perturbation layer when the sigmoid activation function is used in that layer (when using min-max scaling, it is ignored). The sharpness factor is linearly increased from 0.3 at the onset of training to 1.0 by epoch 80.

Gaussian noise is injected into the model logits throughout training to foster exploration and enhance robustness. The standard deviation of this noise is initially set to 0.05 and is reduced to zero according to a cosine decay schedule as training progresses.

The other hyperparameters are listed below:

- Dropout: 0.1 (applied only during training).
- Optimizer: AdamW.

- Learning Rate:  $5 \times 10^{-3}$ .
- Learning Rate Scheduler: `warmup_cosine`, with 50 warmup epochs, decaying to a minimum of  $5 \times 10^{-5}$ .
- Weight Decay:  $1 \times 10^{-4}$ .
- Epochs: 80.
- Batch Size: 4.
- Seed: 42.
- Workers: 16 CPU worker threads for data loading, preprocessing, and decomposition with multiple scaling factors.

## G.2 Inference strategies and local improvement

We evaluate our model using three distinct inference strategies—*Short*, *Medium*, and *Long*—each balancing computational efficiency and local improvement:

**Local improvement.** To further refine the candidate solution, we employ a local search algorithm based on iterative element replacement. At each step, the algorithm considers replacing a single element in the current solution set with one from outside the set (within a defined candidate pool), accepting only replacements that yield a strictly improved objective value. The procedure terminates when no improving replacements are found or when the maximum iteration count is reached.

- **Short:** For each instance, 50 decomposed sets are generated from each scaling factor and the best among them is chosen as the result, with no further local improvement applied.
- **Medium:** For each instance, 100 decomposed sets are generated from each scaling factor and the best among them is chosen as the base set. The base set then undergoes the local improvement procedure, performed for up to 10 iterations. The candidate pool consists of the first  $k$  nodes produced by the scaling factor 0.1 that is not present in the base set.
- **Long:** For each instance, 5 additional augmented graphs are generated (with 0–30% feature noise and 0–30% random edge dropout). For each graph, decomposed sets are generated from each scaling factor and the best among them is chosen as the base set. Local improvement is performed for up to  $k$  iterations on the original graph, with the candidate pool includes all nodes that appears in decomposed sets across from the scaling factor where the base set is selected. The best solution found among all augmented graphs is selected as the final result for the instance.

## G.3 Ablation study: local improvement candidate pool selection

To demonstrate that the strategic selection of nodes in our candidate pool provides meaningful benefits, we conducted an ablation study comparing our decomposition-based candidate pool against a random alternative of equal size. In this ablation test, we maintain the same pre-local improvement solution (the base set) as the starting point for both approaches. The original candidate pool is constructed using our medium and long methods. The alternative candidate pool retains the same base set but replaces the remaining candidates with randomly selected nodes, ensuring both pools have identical size for fair comparison.

Table 2: Ablation study comparing decomposition-based candidate pool versus random alternative. Improvement percentages over the base set.

| Method                     | rand500<br>k=10 |       | rand1000<br>k=20 |       | rand500<br>k=50 |       | rand1000<br>k=100 |       |
|----------------------------|-----------------|-------|------------------|-------|-----------------|-------|-------------------|-------|
|                            | Medium          | Long  | Medium           | Long  | Medium          | Long  | Medium            | Long  |
| Decomposition-based (Ours) | 2.41%           | 3.28% | 5.15%            | 8.09% | 2.11%           | 3.89% | 3.83%             | 8.07% |
| Random Alternative         | 0.23%           | 1.02% | 3.03%            | 5.74% | 0.43%           | 2.39% | 2.84%             | 5.79% |

We evaluate both local improvement strategies across medium and long inference modes. The results, Table 2, demonstrate that our strategic candidate selection provides consistent improvements over

random selection, validating that our local improvement procedure benefits specifically from the candidate pool construction from our decomposition rather than simply having access to additional nodes for local improvement.

#### G.4 Ablation tests for UCOM2

As stated in Section 5.2, we categorize UCOM2 as a non-learning method and conduct several ablation studies to substantiate this classification. Specifically, we evaluate two variants: setting the neural network output to zero (UCOM2-zero-start-short), and to random uniform values between 0 and 1 (UCOM2-randomstart). Both ablations disregard the output of the neural network. We find that UCOM2-zero-start-short achieves results nearly identical to the standard short variant, while UCOM2-randomstart attains similar performance to all three UCOM2 variants, depending on the number of random samples generated. These results demonstrate that UCOM2’s effectiveness is in large part due to their greedy module and the fact that the maximum coverage objective is a monotone submodular function.

Table 3: Ablation results for UCOM2 variants on Random500 and Random1000 datasets. Running time (time): smaller the better. Objective (obj): the larger the better. The standard deviation are captured to show the variability of the dataset and the method.

| Method                   | Random500, $k = 10$ |                   | Random500, $k = 50$ |                   | Random1000, $k = 20$ |                   | Random1000, $k = 100$ |                    |
|--------------------------|---------------------|-------------------|---------------------|-------------------|----------------------|-------------------|-----------------------|--------------------|
|                          | Time↓               | Obj↑              | Time↓               | Obj↑              | Time↓                | Obj↑              | Time↓                 | Obj↑               |
| UCOM2-zero-start-short   | 0.1089 ± 0.0309s    | 15551.01 ± 367.12 | 0.0885 ± 0.1032s    | 44311.87 ± 819.96 | 0.2275 ± 0.0164s     | 30991.19 ± 528.97 | 0.1682 ± 0.0360s      | 88693.99 ± 1248.72 |
| UCOM2-randomstart-short  | 0.8862 ± 0.1238s    | 15294.04 ± 408.52 | 0.6957 ± 0.1369s    | 44237.92 ± 824.05 | 1.6408 ± 0.0329s     | 29878.53 ± 601.10 | 1.5426 ± 0.0449s      | 88549.61 ± 1342.89 |
| UCOM2-randomstart-medium | 3.8521 ± 0.2770s    | 15586.95 ± 360.89 | 15.4367 ± 0.0493s   | 44867.19 ± 741.85 | 9.4358 ± 0.0415s     | 30437.43 ± 532.00 | 8.8802 ± 0.0522s      | 89077.84 ± 1244.72 |
| UCOM2-randomstart-long   | 35.9862 ± 2.5628s   | 15672.89 ± 351.74 | 30.5812 ± 0.0850s   | 44923.74 ± 754.78 | 89.8093 ± 0.3444s    | 30752.49 ± 529.91 | 84.3725 ± 0.4054s     | 89386.56 ± 1245.85 |
| UCOM2-short              | 1.0411 ± 0.0827s    | 15253.35 ± 370.00 | 0.7392 ± 0.0150s    | 44208.95 ± 768.68 | 1.7342 ± 0.0677s     | 29791.66 ± 678.02 | 1.6216 ± 0.0644s      | 88472.61 ± 1261.36 |
| UCOM2-medium             | 4.1891 ± 0.1150s    | 15589.25 ± 363.43 | 16.0005 ± 0.0408s   | 44852.82 ± 765.11 | 9.5523 ± 0.0620s     | 30420.69 ± 552.66 | 8.9956 ± 0.0890s      | 89072.92 ± 1248.58 |
| UCOM2-long               | 39.2018 ± 0.9474s   | 15779.45 ± 358.41 | 31.7587 ± 0.0811s   | 44906.50 ± 761.75 | 90.7475 ± 0.3342s    | 30744.61 ± 512.61 | 85.2663 ± 0.6164s     | 89408.28 ± 1232.74 |

On the twitch dataset, UCOM2 uses zero initialization (UCOM2-zero-start) in its original implementation, fully ignoring the trained model. To assess the impact of the neural network, we also evaluate UCOM2-withmodel on twitch, which yields markedly inferior results. This further supports our observation that all learning-based methods perform poorly on Twitch due to the architecture of the encoder network.

Table 4: Ablation results for UCOM2 variants on the Twitch dataset. Running time (time): smaller the better. Objective (obj): the larger the better. The standard deviations are captured to show the variability of the dataset and the method.

| Method                  | Twitch, $k = 20$     |                     | Twitch, $k = 50$       |                     |
|-------------------------|----------------------|---------------------|------------------------|---------------------|
|                         | Time↓                | Obj↑                | Time↓                  | Obj↑                |
| Ucom2-withmodel-short   | 73.2402 ± 80.5553s   | 18.67 ± 45.72       | 115.8045 ± 126.7061s   | 573.67 ± 376.52     |
| Ucom2-withmodel-medium  | 333.3645 ± 363.4380s | 102.00 ± 41.71      | 532.9243 ± 585.9112s   | 3018.17 ± 5208.31   |
| Ucom2-withmodel-long    | 659.8775 ± 719.8658s | 150.00 ± 48.88      | 1054.5567 ± 1160.6106s | 3029.67 ± 5202.21   |
| Ucom2-zero-start-short  | 17.8031 ± 18.4783s   | 25853.00 ± 1112.59  | 17.3739 ± 18.1940s     | 30526.00 ± 13043.86 |
| Ucom2-zero-start-medium | 19.6806 ± 19.8771s   | 25858.17 ± 11206.89 | 21.6114 ± 21.3478s     | 30544.17 ± 13052.91 |
| Ucom2-zero-start-long   | 22.0589 ± 21.6869s   | 25858.17 ± 11206.89 | 27.2170 ± 25.6604s     | 30544.17 ± 13052.91 |

#### G.5 Detailed results

Below are the plots and tables showing the full detailed test results. The raw numerical results are given in Tables 9 and 10, and Table 11. The standard deviation are captured to show the variability of the dataset and the method.

Table 5: Performance comparison of our method against baseline approaches across Learning without TTO, on multiple datasets. Metrics used are inference time (lower is better) and objective value (higher is better). In the Learning without TTO setting, our short version consistently outperforms all baselines in both inference time and objective value, demonstrating strong learning capability.

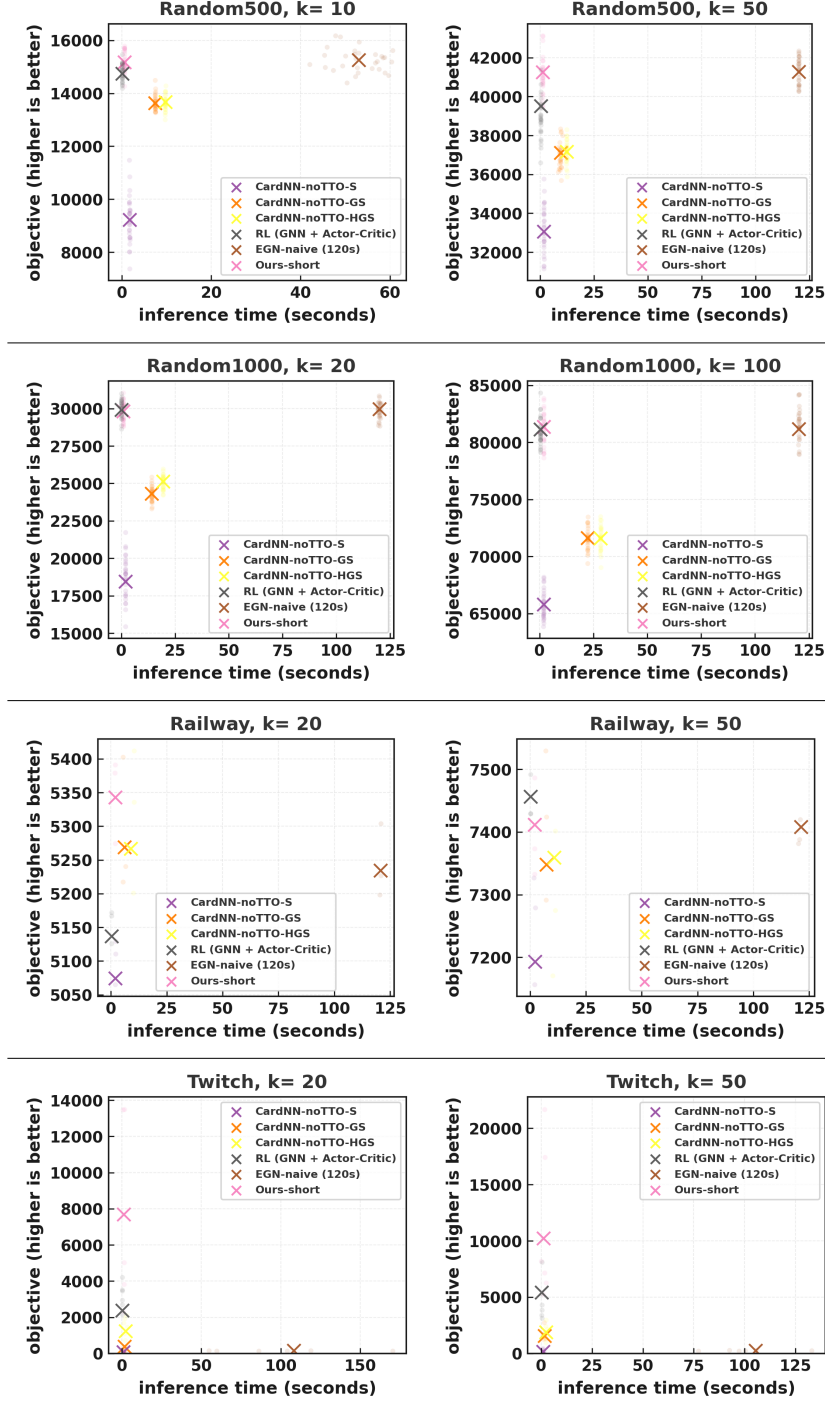

Table 6: Performance comparison of our method against baseline approaches across Learning with TTO, on multiple datasets. Metrics used are inference time (lower is better) and objective value (higher is better). When extended to medium and long versions, our method surpasses most TTO-based baselines across datasets, with the exception of the Twitch dataset.

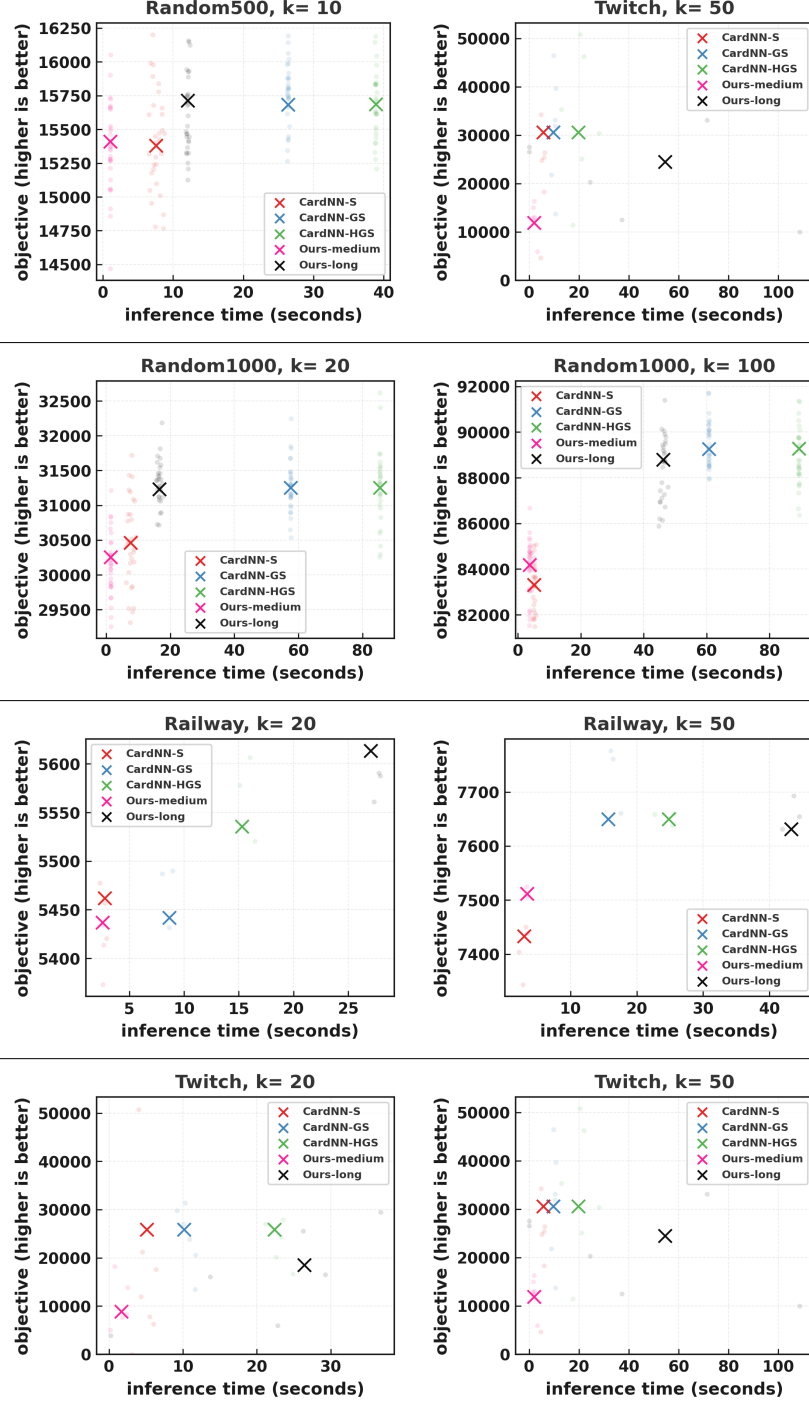

Table 7: Performance comparison of our method against baseline approaches across non-Learning/traditional methods on multiple datasets. Metrics used are inference time (lower is better) and objective value (higher is better). While greedy is an efficient baseline with a strong approximation guarantee, our method performs competitively and is capable of outperforming it on datasets like Random500 for larger values of  $k$ . We are also able to outperform UCOM in several cases (e.g., Random1000 and Railway), though there are instances where greedy and/or UCOM perform the best, such as the twitch dataset.

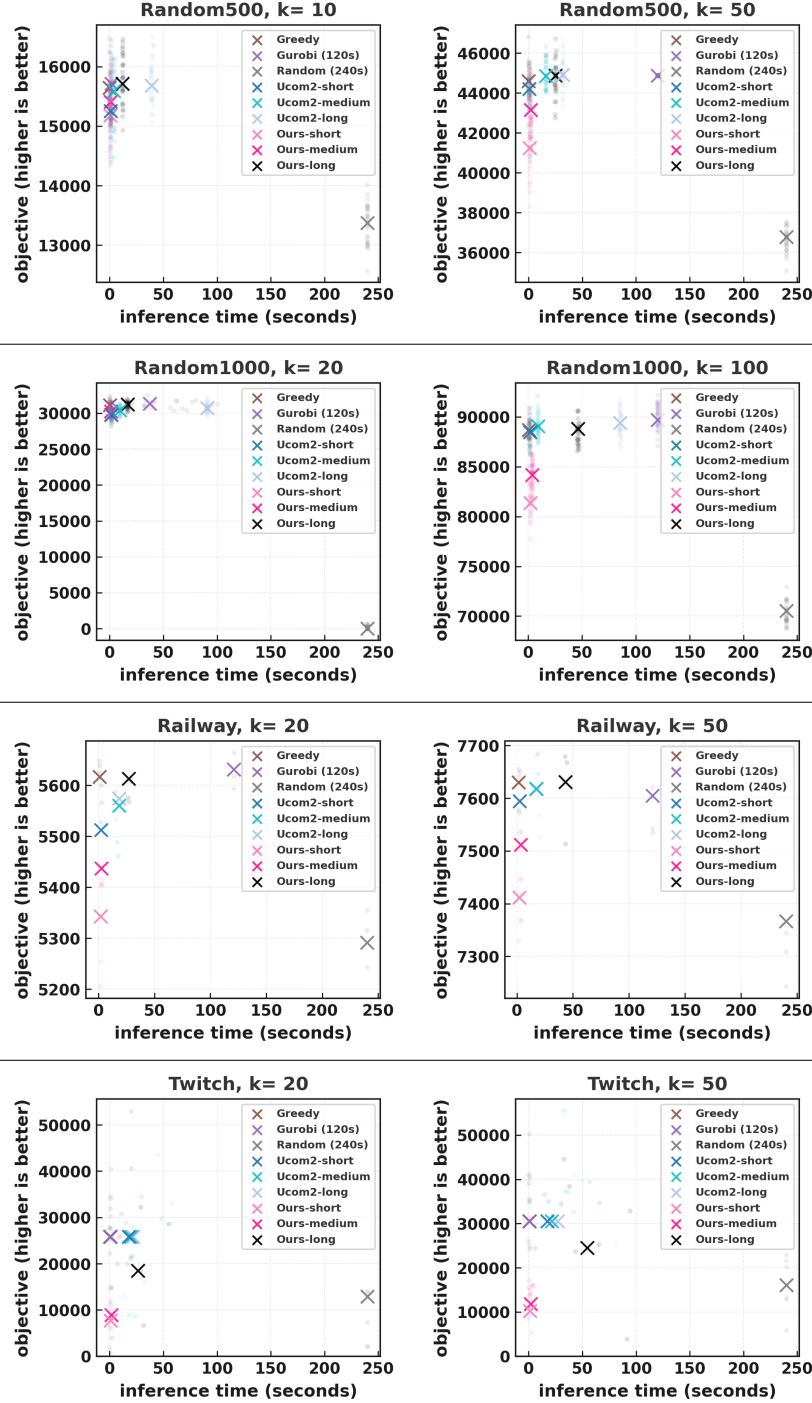



Table 8: Performance comparison of our method against all baseline approaches. Metrics used are inference time (lower is better) and objective value (higher is better).

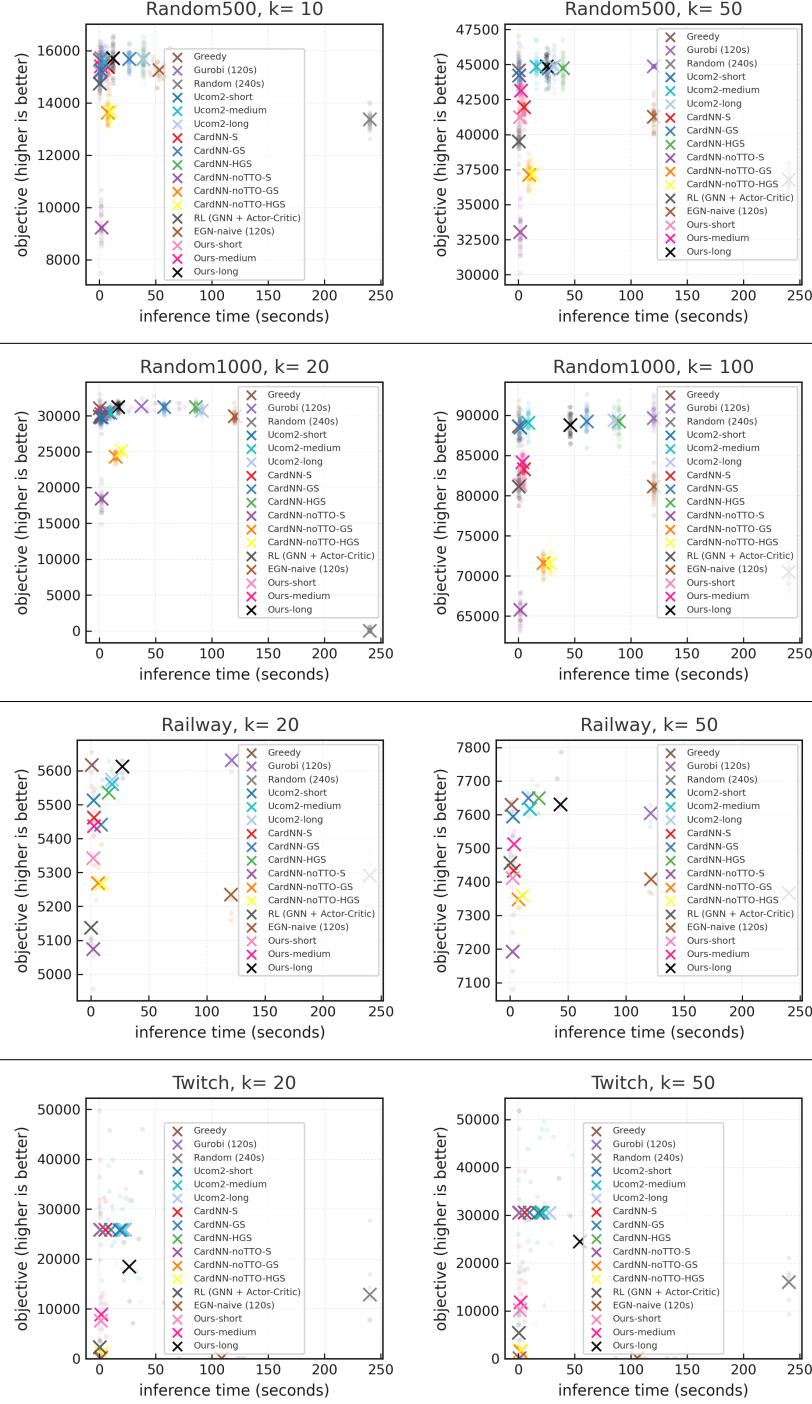

Table 9: Raw numerical results on maximum coverage problem, comparing our method against baseline approaches across Learning without TTO, on multiple datasets. Running time (time): smaller the better. Objective (obj): the larger the better.

| Method               | rand500               |                      |                        |                       | rand1000               |                       |                        |                       | railway                |                    |                        |                    | twitch                  |                        |                         |                       |
|----------------------|-----------------------|----------------------|------------------------|-----------------------|------------------------|-----------------------|------------------------|-----------------------|------------------------|--------------------|------------------------|--------------------|-------------------------|------------------------|-------------------------|-----------------------|
|                      | k=10                  |                      | k=50                   |                       | k=20                   |                       | k=100                  |                       | k=20                   |                    | k=50                   |                    | k=20                    |                        | k=50                    |                       |
|                      | Time↓                 | Obj↑                 | Time↓                  | Obj↑                  | Time↓                  | Obj↑                  | Time↓                  | Obj↑                  | Time↓                  | Obj↑               | Time↓                  | Obj↑               | Time↓                   | Obj↑                   | Time↓                   | Obj↑                  |
| CardNN-noTTO-S       | 1.6880s<br>± 0.0791s  | 9231.54<br>± 827.09  | 1.7211s<br>± 0.0661s   | 33055.87<br>± 1211.03 | 1.8693s<br>± 0.0018s   | 18458.92<br>± 1283.61 | 1.8810s<br>± 0.0453s   | 65793.40<br>± 1478.50 | 1.9287s<br>± 0.2161s   | 5074.33<br>± 59.41 | 2.1892s<br>± 0.2505s   | 7193.00<br>± 80.72 | 0.8636s<br>± 0.2075s    | 77.0000<br>± 51.4704   | 0.9635s<br>± 0.4585s    | 170.50<br>± 158.15    |
| CardNN-noTTO-GS      | 7.4571s<br>± 0.0300s  | 13635.05<br>± 303.36 | 9.524s<br>± 0.5770s    | 37120.46<br>± 610.25  | 14.1629s<br>± 0.0301s  | 24309.37<br>± 465.91  | 22.3352s<br>± 0.0942s  | 71620.38<br>± 1026.81 | 5.9863s<br>± 0.5143s   | 5269.00<br>± 68.83 | 7.3275s<br>± 0.3261s   | 7348.33<br>± 80.31 | 1.5749s<br>± 0.3842s    | 376.0000<br>± 194.6679 | 1.6334s<br>± 0.6782s    | 1574.33<br>± 631.04   |
| CardNN-noTTO-HGS     | 9.6954s<br>± 0.0429s  | 13671.99<br>± 302.84 | 12.2502s<br>± 0.1068s  | 37164.81<br>± 678.19  | 19.3888s<br>± 0.0532s  | 25135.52<br>± 436.21  | 28.3368s<br>± 0.1218s  | 71604.61<br>± 1010.17 | 8.8791s<br>± 0.7784s   | 5266.67<br>± 76.01 | 10.8211s<br>± 0.6323s  | 7359.00<br>± 70.89 | 2.1831s<br>± 0.7328s    | 1242.33<br>± 499.23    | 2.3674s<br>± 0.7858s    | 1898.00<br>± 506.67   |
| EGN-naive(120s)      | 53.0409s<br>± 5.3879s | 15262.76<br>± 401.10 | 120.1361s<br>± 0.0796s | 41272.68<br>± 737.36  | 120.0105s<br>± 0.3980s | 29968.04<br>± 563.02  | 120.3565s<br>± 0.1600s | 81166.12<br>± 1391.02 | 120.6763s<br>± 0.2931s | 5234.67<br>± 52.47 | 121.3351s<br>± 0.9133s | 7408.33<br>± 72.82 | 108.3030s<br>± 24.3569s | 152.67<br>± 12.22      | 105.4605s<br>± 20.7886s | 247.17<br>± 31.88     |
| RL(GNN+Actor-Critic) | 0.0696<br>± 0.0028s   | 14741.26<br>± 322.51 | 0.2471<br>± 0.029s     | 39510.96<br>± 975.21  | 0.1021<br>± 0.0029s    | 29912.14<br>± 571.12  | 0.4652<br>± 0.0029s    | 81158.54<br>± 1215.23 | 0.2191<br>± 0.0030s    | 5137<br>± 52.01    | 0.2191<br>± 0.0031s    | 7456.67<br>± 57.14 | 0.1694<br>± 0.0028s     | 2379.5<br>± 1471.50    | 0.2905<br>± 0.0030s     | 5435.5<br>± 3318.67   |
| Ours-short           | 0.5786s<br>± 0.0094s  | 15177.77<br>± 344.68 | 1.1078s<br>± 0.0149s   | 41247.80<br>± 965.48  | 0.8248s<br>± 0.0312s   | 29810.12<br>± 586.05  | 1.9076s<br>± 0.0284s   | 81357.29<br>± 1277.84 | 1.8559s<br>± 0.0458s   | 5343.00<br>± 89.17 | 2.0838s<br>± 0.0142s   | 7411.67<br>± 55.08 | 1.0975s<br>± 0.7446s    | 7689.00<br>± 5712.56   | 1.1485s<br>± 0.7596s    | 10227.00<br>± 5537.29 |

Table 10: Raw numerical results on maximum coverage problem, comparing our method against baseline approaches with TTO. Running time (time): smaller the better. Objective (obj): the larger the better.

| Method      | rand500             |                    |                     |                       | rand1000            |                    |                     |                       | railway             |                  |                     |                  | twitch              |                      |                     |                      |
|-------------|---------------------|--------------------|---------------------|-----------------------|---------------------|--------------------|---------------------|-----------------------|---------------------|------------------|---------------------|------------------|---------------------|----------------------|---------------------|----------------------|
|             | k=10                |                    | k=50                |                       | k=20                |                    | k=100               |                       | k=20                |                  | k=50                |                  | k=20                |                      | k=50                |                      |
|             | Time↓               | Obj↑               | Time↓               | Obj↑                  | Time↓               | Obj↑               | Time↓               | Obj↑                  | Time↓               | Obj↑             | Time↓               | Obj↑             | Time↓               | Obj↑                 | Time↓               | Obj↑                 |
| CardNN-S    | 7.5387s<br>±        | 15381.60<br>±      | 4.9843<br>±         | 41971.22<br>± 814.87  | 7.6054s<br>±        | 30461.73<br>±      | 5.0909s<br>±        | 83319.37<br>± 1324.81 | 2.7580s<br>±        | 5462.00<br>±     | 3.0035s<br>±        | 7433.33<br>±     | 5.1258s<br>±        | 25863.83<br>±        | 5.5767s<br>±        | 30556.00<br>±        |
| CardNN-GS   | 0.6576s<br>26.3746  | 394.79<br>15683.40 | 0.2941<br>26.8944s  | 44724.42<br>± 773.70  | 0.6608s<br>57.5445s | 590.50<br>31250.56 | 0.3016s<br>60.7239s | 89269.41<br>± 1253.68 | 0.2705s<br>8.6626s  | 56.00<br>5441.67 | 0.2782s<br>15.6866s | 63.34<br>7650.00 | 0.6503s<br>10.1648s | 11198.96<br>25864.00 | 0.5135s<br>9.5794   | 13063.12<br>30560.67 |
| CardNN-HGS  | 0.0831<br>38.8875s  | 350.79<br>15685.39 | 0.1131s<br>39.6041s | 44745.20<br>± 769.93  | 0.0670s<br>85.4505s | 528.72<br>31250.47 | 0.0665s<br>89.3385s | 89280.17<br>± 1261.34 | 0.5672s<br>15.2983s | 58.77<br>5535.67 | 1.0987s<br>24.7941s | 73.33<br>7650.00 | 1.1928s<br>22.3602s | 11198.73<br>25864.00 | 1.5230<br>19.7813s  | 13061.60<br>30560.83 |
|             | 0.1065s             | 349.83             | 0.1122s             |                       | 0.0952s             | 526.03             | 0.1235s             |                       | 0.5441s             | 64.52            | 0.9907s             | 88.71            | 1.2962s             | 11198.73             | 3.4102s             | 13061.35             |
| Ours-medium | 1.0546s<br>±        | 15410.23<br>±      | 2.1212s<br>±        | 43152.87<br>± 1004.95 | 1.4175s<br>±        | 30257.05<br>±      | 3.6669s<br>±        | 84186.79<br>± 1336.48 | 2.5628s<br>±        | 5437.00<br>±     | 3.4385s<br>±        | 7512.00<br>±     | 1.6693s<br>±        | 8887.83<br>±         | 1.9401s<br>±        | 11858.50<br>±        |
| Ours-long   | 0.0146s<br>12.0878s | 353.91<br>15714.63 | 0.0096s<br>24.9885s | 44866.84<br>± 876.78  | 0.0633s<br>16.6007s | 606.07<br>31230.26 | 0.0582s<br>46.1200s | 88796.03<br>± 1327.83 | 0.0418s<br>27.0344s | 66.84<br>5613.33 | 0.0532s<br>43.2777s | 63.85<br>7631.00 | 0.9268s<br>26.4401s | 5087.20<br>18526.83  | 1.0147s<br>54.4778s | 4793.61<br>24509.83  |
|             | 0.1365s             | 354.22             | 0.3543s             |                       | 0.4632s             | 476.25             | 0.6998s             |                       | 0.9617s             | 55.58            | 1.3728s             | 75.19            | 15.9632s            | 8671.00              | 32.5091s            | 11171.33             |

Table 11: Raw numerical results on maximum coverage problem, comparing our method against non-learning/traditional baseline approaches. Running time (time): smaller the better. Objective (obj): the larger the better.

| Method        | rand500  |          |          |           | rand1000 |            |          |           | railway  |         |          |         | twitch   |          |          |          |
|---------------|----------|----------|----------|-----------|----------|------------|----------|-----------|----------|---------|----------|---------|----------|----------|----------|----------|
|               | k=10     |          | k=50     |           | k=20     |            | k=100    |           | k=20     |         | k=50     |         | k=20     |          | k=50     |          |
|               | Time↓    | Obj↑     | Time↓    | Obj↑      | Time↓    | Obj↑       | Time↓    | Obj↑      | Time↓    | Obj↑    | Time↓    | Obj↑    | Time↓    | Obj↑     | Time↓    | Obj↑     |
| Random (240s) | 240.0000 | 13372.76 | 240.0000 | 36786.89  | 240.0000 | 24133.50   | 240.0000 | 70527.31  | 240.0000 | 5291.67 | 240.0000 | 7367.00 | 240.0000 | 12889.17 | 240.0000 | 16050.50 |
| Gurobi (120s) | ±        | ±        | ±        | ±         | ±        | ±          | ±        | ±         | ±        | ±       | ±        | ±       | ±        | ±        | ±        | ±        |
|               | 0.000s   | 308.83   | 0.000s   | ± 655.45  | 0.000s   | 390.27     | 0.000s   | ± 1051.87 | 0.000s   | 73.92   | 0.000s   | 76.97   | 0.000s   | 5636.10  | 0.000s   | 6715.32  |
| Greedy        | 1.5744   | 15714.90 | 120.0651 | 44880.59  | 37.2985  | 31347.6200 | 0.1395   | 89696.83  | 121.0590 | 5631.67 | 121.0329 | 7604.67 | 0.8221   | 25864.00 | 0.7961s  | 30560.33 |
|               | ±        | ±        | ±        | ± 7.132   | ±        | ±          | ±        | ± 1231.76 | ±        | ±       | ±        | 62.38   | ±        | ±        | ±        | ±        |
| Ucom2-short   | 0.5376s  | 346.84   | 0.0268s  | ±         | 30.0300s | 509.75     | 0.0526s  | ±         | 0.0318s  | 28.77   | 0.0613s  | ±       | 0.5700s  | 10223.00 | 0.6577s  | 11922.45 |
|               | 0.0572s  | 15640.99 | 0.1210s  | 44597.56  | 0.1905s  | 31105.89   | 0.4609s  | 88685.40  | 0.7271s  | 5617.00 | 1.3196s  | 7630.00 | 0.3970s  | 25855.50 | 0.6553s  | 30542.33 |
| Ucom2-medium  | ±        | ±        | ±        | ± 848.28  | ±        | ±          | ±        | ± 1225.67 | ±        | ±       | ±        | 72.19   | ±        | ±        | ±        | ±        |
|               | 0.0502s  | 360.60   | 0.0563s  | 44208.95  | 0.0998s  | 506.23     | 0.1074s  | 88472.61  | 0.0251s  | 49.00   | 0.5774s  | 7594.67 | 0.2536s  | 11207.33 | 0.3883s  | 13055.67 |
| Ucom2-long    | 1.0411s  | 15253.35 | 0.7392s  | ± 768.68  | 1.7342   | 29791.66   | 1.6216   | ± 1261.36 | 2.2988   | 5512.67 | 2.4537   | 68.72   | 17.8031  | 25833.00 | 17.3739  | 30526.00 |
|               | ±        | ±        | ±        | ±         | ±        | ±          | ±        | ±         | ±        | ±       | ±        | ±       | ±        | ±        | ±        | ±        |
| Ours-short    | 0.0827s  | 370.00   | 0.0150s  | 44852.82  | 0.0677s  | 678.02     | 0.0644s  | 89072.92  | 0.2026s  | 56.89   | 0.3920s  | 7618.00 | 18.4783s | 11212.59 | 18.1940s | 13043.86 |
|               | 4.1891   | 15589.25 | 16.0005  | ± 765.11  | 9.5523   | 30420.69   | 8.9956   | ± 1248.58 | 18.2307  | 5560.33 | 17.1635  | 79.76   | 19.6806  | 25858.17 | 21.6114  | 30544.17 |
| Ours-medium   | ±        | ±        | ±        | ±         | ±        | ±          | ±        | ±         | ±        | ±       | ±        | ±       | ±        | ±        | ±        | ±        |
|               | 0.1150s  | 363.43   | 0.0408s  | 44906.50  | 0.0620s  | 552.66     | 0.089s   | 89408.28  | 2.4105s  | 44.56   | 2.2504s  | 81.19   | 19.8771s | 11206.89 | 21.3478s | 13052.91 |
| Ours-long     | 39.2018  | 15679.45 | 31.7587  | ± 761.75  | 90.7475  | 30744.61   | 85.2663  | ± 1232.74 | 18.3035  | 5574.33 | 17.1988  | 7617.00 | 22.0589  | 25858.17 | 27.2170  | 30544.17 |
|               | ±        | ±        | ±        | ±         | ±        | ±          | ±        | ±         | ±        | ±       | ±        | ±       | ±        | ±        | ±        | ±        |
| Ours-short    | 0.9474s  | 358.41   | 0.0811s  | ±         | 0.3342s  | 512.61     | 0.6164s  | ±         | 2.4544s  | 58.79   | 2.2001s  | ±       | 21.6886s | 11206.89 | 25.6604s | 13052.91 |
|               | ±        | ±        | ±        | ±         | ±        | ±          | ±        | ±         | ±        | ±       | ±        | ±       | ±        | ±        | ±        | ±        |
| Ours-medium   | 0.5786s  | 15177.77 | 1.1078s  | 41247.80  | 0.8248s  | 29810.12   | 1.9076s  | 81357.29  | 1.8559s  | 5343.00 | 2.0838s  | 7411.67 | 1.0975s  | 7689.00  | 1.1485s  | 10227.00 |
|               | ±        | ±        | ±        | ± 965.48  | ±        | ±          | ±        | ± 1277.84 | ±        | ±       | ±        | 55.08   | ±        | ±        | ±        | ±        |
| Ours-long     | 0.0094s  | 344.68   | 0.0149s  | 43152.87  | 0.0312s  | 586.05     | 0.0284s  | 84186.79  | 0.0458s  | 89.17   | 0.0142s  | 7512.00 | 0.7446s  | 5712.56  | 0.7596s  | 5537.29  |
|               | 1.0546s  | 15410.23 | 2.1212s  | ± 1004.95 | 1.4175s  | 30257.05   | 3.6669s  | ± 1336.48 | 2.5628s  | 5437.00 | 3.4385s  | 63.85   | 1.6693s  | 8887.83  | 1.9401s  | 11858.50 |
| Ours-long     | ±        | ±        | ±        | ±         | ±        | ±          | ±        | ±         | ±        | ±       | ±        | ±       | ±        | ±        | ±        | ±        |
|               | 0.0146s  | 353.91   | 0.0096s  | 44866.84  | 0.0633s  | 606.07     | 0.0582s  | 88796.03  | 0.0418s  | 66.84   | 0.0532s  | 7631.00 | 0.9268s  | 5087.20  | 1.0147s  | 4793.61  |
| Ours-long     | 12.0878s | 15714.63 | 24.9885s | ± 876.78  | 16.6007s | 31230.26   | 46.1200s | ± 1327.83 | 27.0344s | 5613.33 | 43.2777s | 75.19   | 26.4401s | 18526.83 | 54.4778s | 24509.83 |
|               | ±        | ±        | ±        | ±         | ±        | ±          | ±        | ±         | ±        | ±       | ±        | ±       | ±        | ±        | ±        | ±        |
| Ours-long     | 0.1365s  | 354.22   | 0.3543s  | ±         | 0.4632s  | 476.25     | 0.6998s  | ±         | 0.9617s  | 55.58   | 1.3728s  | ±       | 15.9632s | 8671.00  | 32.5091s | 11171.33 |
|               | ±        | ±        | ±        | ±         | ±        | ±          | ±        | ±         | ±        | ±       | ±        | ±       | ±        | ±        | ±        | ±        |

## 1179 H Max-Cut Ablation

1180 **Datasets.** We conduct experiments on two datasets. The IMDB-BINARY dataset [91] consists  
 1181 of 1000 graphs. The Erdős–Rényi dataset consists of 1000 synthetic graphs generated under the  
 1182  $G(n, p)$  model. For each graph, the number of nodes  $n$  is drawn uniformly from  $\{50, \dots, 100\}$  and  
 1183 each candidate edge is included independently with probability  $p = 0.15$ . Our experiments use the  
 1184 following split for both datasets. 60% of the graphs are allocated for training, 20% for validation,  
 1185 and the final 20% for testing. Within each split, any graphs with fewer than  $k$  nodes are excluded.  
 1186 We compare in two settings, one of small and one of large  $k$ , where  $k$  is selected as a fraction of  
 1187 the average number of nodes in the dataset. For small  $k$  we pick the fraction to be 0.25 of the node  
 1188 average and for the large  $k$  we pick 0.75.

1189 **Direct optimization.** In the direct optimization approach, we assign vector  $\mathbf{x} \in \mathbb{R}^n$  using the  
 1190 perturbation method described in Section 4.1 and treat it as a perturbation from the uniform point (i.e.  
 1191  $(k/n, k/n, \dots, k/n)$ ) in  $\Delta_{n,k}$ . We optimize it directly with Adam [39]. For IMDB-BINARY, we set  
 1192 the learning rate to 0.015, and for Erdős–Rényi, the learning rate was set to 0.012. Each optimization  
 1193 run consists of 150 update steps.

1194 **Neural net architecture.** For the network based approach, from the uniform vector  $\mathbf{x} \in \mathbb{R}^n$  such  
 1195 that  $x_i = k/n$ , we generate a perturbation vector as described in Section 4.1. The perturbed interior  
 1196 point is the starting point in the hypercube for the decomposition, and gradient descent is used to  
 1197 optimize the perturbation. Here, the neural network is two eight-layer GatedGraphConv networks [49]  
 1198 followed by two linear layers. Node features include random-walk positional encodings generated  
 1199 with AddRandomWalkPE [18] with walk length 10. The results are presented in the table below.

1200 **Standard SSL.** In the standard SSL baseline, we train the same architecture on the training data and  
 1201 do model selection using the validation set. We observe that while the trained SSL baseline is not able  
 1202 to match the performance of a neural net directly optimized on the test set, it consistently produces  
 1203 performance that is competitive with direct optimization without a neural net and competitive with  
 1204 greedy for large  $k$ .

Table 12: Test-set performance (mean  $\pm$  std) on IMDB-BINARY graphs (avg. 20 nodes) and Erdős–Rényi graphs (avg. 75 nodes, edge density 0.15).

| Method                            | IMDB-BINARY       |                   | Erdős–Rényi       |                   |
|-----------------------------------|-------------------|-------------------|-------------------|-------------------|
|                                   | $k = 5$           | $k = 15$          | $k = 15$          | $k = 60$          |
| Greedy Algorithm                  | $1.000 \pm 0.002$ | $0.801 \pm 0.195$ | $0.985 \pm 0.015$ | $0.900 \pm 0.047$ |
| Random Sampling + Decomp          | $0.881 \pm 0.140$ | $0.850 \pm 0.179$ | $0.753 \pm 0.038$ | $0.761 \pm 0.041$ |
| Direct optimization + Decomp      | $0.960 \pm 0.064$ | $0.922 \pm 0.158$ | $0.833 \pm 0.025$ | $0.844 \pm 0.043$ |
| NN + Direct optimization + Decomp | $0.971 \pm 0.041$ | $0.932 \pm 0.089$ | $0.910 \pm 0.045$ | $0.902 \pm 0.041$ |
| Standard SSL + Decomp             | $0.956 \pm 0.049$ | $0.905 \pm 0.117$ | $0.899 \pm 0.035$ | $0.889 \pm 0.044$ |

## 1205 NeurIPS Paper Checklist

### 1206 1. Claims

1207 Question: Do the main claims made in the abstract and introduction accurately reflect the  
1208 paper's contributions and scope?

1209 Answer: [Yes]

1210 Justification: We claim to provide an end-to-end pipeline for neural combinatorial optimiza-  
1211 tion with constraints (section 4), which has applications to several fundamental constraint  
1212 classes (section 4.2.1 and 4.2.2), all of which are clearly given in the paper. In section 5, we  
1213 support our claims with experimental results.

1214 Guidelines:

- 1215 • The answer NA means that the abstract and introduction do not include the claims  
1216 made in the paper.
- 1217 • The abstract and/or introduction should clearly state the claims made, including the  
1218 contributions made in the paper and important assumptions and limitations. A No or  
1219 NA answer to this question will not be perceived well by the reviewers.
- 1220 • The claims made should match theoretical and experimental results, and reflect how  
1221 much the results can be expected to generalize to other settings.
- 1222 • It is fine to include aspirational goals as motivation as long as it is clear that these goals  
1223 are not attained by the paper.

### 1224 2. Limitations

1225 Question: Does the paper discuss the limitations of the work performed by the authors?

1226 Answer: [Yes]

1227 Justification: The limitations are discussed in the experiment section and also in the con-  
1228 clusion. Also, when we discuss the general pipeline we do not claim it covers all possible  
1229 constrained CO problems.

1230 Guidelines:

- 1231 • The answer NA means that the paper has no limitation while the answer No means that  
1232 the paper has limitations, but those are not discussed in the paper.
- 1233 • The authors are encouraged to create a separate "Limitations" section in their paper.
- 1234 • The paper should point out any strong assumptions and how robust the results are to  
1235 violations of these assumptions (e.g., independence assumptions, noiseless settings,  
1236 model well-specification, asymptotic approximations only holding locally). The authors  
1237 should reflect on how these assumptions might be violated in practice and what the  
1238 implications would be.
- 1239 • The authors should reflect on the scope of the claims made, e.g., if the approach was  
1240 only tested on a few datasets or with a few runs. In general, empirical results often  
1241 depend on implicit assumptions, which should be articulated.
- 1242 • The authors should reflect on the factors that influence the performance of the approach.  
1243 For example, a facial recognition algorithm may perform poorly when image resolution  
1244 is low or images are taken in low lighting. Or a speech-to-text system might not be  
1245 used reliably to provide closed captions for online lectures because it fails to handle  
1246 technical jargon.
- 1247 • The authors should discuss the computational efficiency of the proposed algorithms  
1248 and how they scale with dataset size.
- 1249 • If applicable, the authors should discuss possible limitations of their approach to  
1250 address problems of privacy and fairness.
- 1251 • While the authors might fear that complete honesty about limitations might be used by  
1252 reviewers as grounds for rejection, a worse outcome might be that reviewers discover  
1253 limitations that aren't acknowledged in the paper. The authors should use their best  
1254 judgment and recognize that individual actions in favor of transparency play an impor-  
1255 tant role in developing norms that preserve the integrity of the community. Reviewers  
1256 will be specifically instructed to not penalize honesty concerning limitations.

### 1257 3. Theory assumptions and proofs



Question: For each theoretical result, does the paper provide the full set of assumptions and a complete (and correct) proof?

Answer: [Yes]

Justification: Assumptions are stated in theorem statements and all proofs are provided in the appendix.

Guidelines:

- The answer NA means that the paper does not include theoretical results.
- All the theorems, formulas, and proofs in the paper should be numbered and cross-referenced.
- All assumptions should be clearly stated or referenced in the statement of any theorems.
- The proofs can either appear in the main paper or the supplemental material, but if they appear in the supplemental material, the authors are encouraged to provide a short proof sketch to provide intuition.
- Inversely, any informal proof provided in the core of the paper should be complemented by formal proofs provided in appendix or supplemental material.
- Theorems and Lemmas that the proof relies upon should be properly referenced.

#### 4. Experimental result reproducibility

Question: Does the paper fully disclose all the information needed to reproduce the main experimental results of the paper to the extent that it affects the main claims and/or conclusions of the paper (regardless of whether the code and data are provided or not)?

Answer: [Yes]

Justification: All the details of the experiments such as training and dataset details are provided either in the main body of the paper or appendix.

Guidelines:

- The answer NA means that the paper does not include experiments.
- If the paper includes experiments, a No answer to this question will not be perceived well by the reviewers: Making the paper reproducible is important, regardless of whether the code and data are provided or not.
- If the contribution is a dataset and/or model, the authors should describe the steps taken to make their results reproducible or verifiable.
- Depending on the contribution, reproducibility can be accomplished in various ways. For example, if the contribution is a novel architecture, describing the architecture fully might suffice, or if the contribution is a specific model and empirical evaluation, it may be necessary to either make it possible for others to replicate the model with the same dataset, or provide access to the model. In general, releasing code and data is often one good way to accomplish this, but reproducibility can also be provided via detailed instructions for how to replicate the results, access to a hosted model (e.g., in the case of a large language model), releasing of a model checkpoint, or other means that are appropriate to the research performed.
- While NeurIPS does not require releasing code, the conference does require all submissions to provide some reasonable avenue for reproducibility, which may depend on the nature of the contribution. For example
  - (a) If the contribution is primarily a new algorithm, the paper should make it clear how to reproduce that algorithm.
  - (b) If the contribution is primarily a new model architecture, the paper should describe the architecture clearly and fully.
  - (c) If the contribution is a new model (e.g., a large language model), then there should either be a way to access this model for reproducing the results or a way to reproduce the model (e.g., with an open-source dataset or instructions for how to construct the dataset).
  - (d) We recognize that reproducibility may be tricky in some cases, in which case authors are welcome to describe the particular way they provide for reproducibility. In the case of closed-source models, it may be that access to the model is limited in some way (e.g., to registered users), but it should be possible for other researchers to have some path to reproducing or verifying the results.

## 5. Open access to data and code

Question: Does the paper provide open access to the data and code, with sufficient instructions to faithfully reproduce the main experimental results, as described in supplemental material?

Answer: [Yes]

Justification: All the datasets are public. Our code is available [https://anonymous.4open.science/r/Neural\\_Combinatorial\\_Optimization\\_with\\_Constraints-3485/README.md](https://anonymous.4open.science/r/Neural_Combinatorial_Optimization_with_Constraints-3485/README.md).

Guidelines:

- The answer NA means that paper does not include experiments requiring code.
- Please see the NeurIPS code and data submission guidelines (<https://nips.cc/public/guides/CodeSubmissionPolicy>) for more details.
- While we encourage the release of code and data, we understand that this might not be possible, so “No” is an acceptable answer. Papers cannot be rejected simply for not including code, unless this is central to the contribution (e.g., for a new open-source benchmark).
- The instructions should contain the exact command and environment needed to run to reproduce the results. See the NeurIPS code and data submission guidelines (<https://nips.cc/public/guides/CodeSubmissionPolicy>) for more details.
- The authors should provide instructions on data access and preparation, including how to access the raw data, preprocessed data, intermediate data, and generated data, etc.
- The authors should provide scripts to reproduce all experimental results for the new proposed method and baselines. If only a subset of experiments are reproducible, they should state which ones are omitted from the script and why.
- At submission time, to preserve anonymity, the authors should release anonymized versions (if applicable).
- Providing as much information as possible in supplemental material (appended to the paper) is recommended, but including URLs to data and code is permitted.

## 6. Experimental setting/details

Question: Does the paper specify all the training and test details (e.g., data splits, hyper-parameters, how they were chosen, type of optimizer, etc.) necessary to understand the results?

Answer: [Yes]

Justification: All the details of the experiments such as training and dataset details are provided either in the main body of the paper or appendix.

Guidelines:

- The answer NA means that the paper does not include experiments.
- The experimental setting should be presented in the core of the paper to a level of detail that is necessary to appreciate the results and make sense of them.
- The full details can be provided either with the code, in appendix, or as supplemental material.

## 7. Experiment statistical significance

Question: Does the paper report error bars suitably and correctly defined or other appropriate information about the statistical significance of the experiments?

Answer: [No]

Justification: We do not report error bars or statistical significance due to computational and time constraints; as is common in combinatorial optimization, we report mean results over multiple problem instances.

Guidelines:

- The answer NA means that the paper does not include experiments.

- The authors should answer "Yes" if the results are accompanied by error bars, confidence intervals, or statistical significance tests, at least for the experiments that support the main claims of the paper.
- The factors of variability that the error bars are capturing should be clearly stated (for example, train/test split, initialization, random drawing of some parameter, or overall run with given experimental conditions).
- The method for calculating the error bars should be explained (closed form formula, call to a library function, bootstrap, etc.)
- The assumptions made should be given (e.g., Normally distributed errors).
- It should be clear whether the error bar is the standard deviation or the standard error of the mean.
- It is OK to report 1-sigma error bars, but one should state it. The authors should preferably report a 2-sigma error bar than state that they have a 96% CI, if the hypothesis of Normality of errors is not verified.
- For asymmetric distributions, the authors should be careful not to show in tables or figures symmetric error bars that would yield results that are out of range (e.g. negative error rates).
- If error bars are reported in tables or plots, The authors should explain in the text how they were calculated and reference the corresponding figures or tables in the text.

## 8. Experiments compute resources

Question: For each experiment, does the paper provide sufficient information on the computer resources (type of compute workers, memory, time of execution) needed to reproduce the experiments?

Answer: [Yes]

Justification: Details are provided in the appendix.

Guidelines:

- The answer NA means that the paper does not include experiments.
- The paper should indicate the type of compute workers CPU or GPU, internal cluster, or cloud provider, including relevant memory and storage.
- The paper should provide the amount of compute required for each of the individual experimental runs as well as estimate the total compute.
- The paper should disclose whether the full research project required more compute than the experiments reported in the paper (e.g., preliminary or failed experiments that didn't make it into the paper).

## 9. Code of ethics

Question: Does the research conducted in the paper conform, in every respect, with the NeurIPS Code of Ethics <https://neurips.cc/public/EthicsGuidelines>?

Answer: [Yes]

Justification: Given the focus on foundations, we do not have human subjects or sensitive data and we do not perceive risks of harm or misuse.

Guidelines:

- The answer NA means that the authors have not reviewed the NeurIPS Code of Ethics.
- If the authors answer No, they should explain the special circumstances that require a deviation from the Code of Ethics.
- The authors should make sure to preserve anonymity (e.g., if there is a special consideration due to laws or regulations in their jurisdiction).

## 10. Broader impacts

Question: Does the paper discuss both potential positive societal impacts and negative societal impacts of the work performed?

Answer: [NA]

Justification: The societal impact of improved combinatorial optimization or neural combinatorial optimization techniques are minimal.

Guidelines:

- The answer NA means that there is no societal impact of the work performed.
- If the authors answer NA or No, they should explain why their work has no societal impact or why the paper does not address societal impact.
- Examples of negative societal impacts include potential malicious or unintended uses (e.g., disinformation, generating fake profiles, surveillance), fairness considerations (e.g., deployment of technologies that could make decisions that unfairly impact specific groups), privacy considerations, and security considerations.
- The conference expects that many papers will be foundational research and not tied to particular applications, let alone deployments. However, if there is a direct path to any negative applications, the authors should point it out. For example, it is legitimate to point out that an improvement in the quality of generative models could be used to generate deepfakes for disinformation. On the other hand, it is not needed to point out that a generic algorithm for optimizing neural networks could enable people to train models that generate Deepfakes faster.
- The authors should consider possible harms that could arise when the technology is being used as intended and functioning correctly, harms that could arise when the technology is being used as intended but gives incorrect results, and harms following from (intentional or unintentional) misuse of the technology.
- If there are negative societal impacts, the authors could also discuss possible mitigation strategies (e.g., gated release of models, providing defenses in addition to attacks, mechanisms for monitoring misuse, mechanisms to monitor how a system learns from feedback over time, improving the efficiency and accessibility of ML).

## 11. Safeguards

Question: Does the paper describe safeguards that have been put in place for responsible release of data or models that have a high risk for misuse (e.g., pretrained language models, image generators, or scraped datasets)?

Answer: [NA]

Justification: The paper does not contain data or models that have a high risk for misuse.

Guidelines:

- The answer NA means that the paper poses no such risks.
- Released models that have a high risk for misuse or dual-use should be released with necessary safeguards to allow for controlled use of the model, for example by requiring that users adhere to usage guidelines or restrictions to access the model or implementing safety filters.
- Datasets that have been scraped from the Internet could pose safety risks. The authors should describe how they avoided releasing unsafe images.
- We recognize that providing effective safeguards is challenging, and many papers do not require this, but we encourage authors to take this into account and make a best faith effort.

## 12. Licenses for existing assets

Question: Are the creators or original owners of assets (e.g., code, data, models), used in the paper, properly credited and are the license and terms of use explicitly mentioned and properly respected?

Answer: [Yes]

Justification: We provide citations to all data and code we use. All material is licensed for such use.

Guidelines:

- The answer NA means that the paper does not use existing assets.
- The authors should cite the original paper that produced the code package or dataset.
- The authors should state which version of the asset is used and, if possible, include a URL.
- The name of the license (e.g., CC-BY 4.0) should be included for each asset.

- For scraped data from a particular source (e.g., website), the copyright and terms of service of that source should be provided.
- If assets are released, the license, copyright information, and terms of use in the package should be provided. For popular datasets, [paperswithcode.com/datasets](https://paperswithcode.com/datasets) has curated licenses for some datasets. Their licensing guide can help determine the license of a dataset.
- For existing datasets that are re-packaged, both the original license and the license of the derived asset (if it has changed) should be provided.
- If this information is not available online, the authors are encouraged to reach out to the asset's creators.

### 13. New assets

Question: Are new assets introduced in the paper well documented and is the documentation provided alongside the assets?

Answer: [NA]

Justification: There are no new assets released in this paper.

Guidelines:

- The answer NA means that the paper does not release new assets.
- Researchers should communicate the details of the dataset/code/model as part of their submissions via structured templates. This includes details about training, license, limitations, etc.
- The paper should discuss whether and how consent was obtained from people whose asset is used.
- At submission time, remember to anonymize your assets (if applicable). You can either create an anonymized URL or include an anonymized zip file.

### 14. Crowdsourcing and research with human subjects

Question: For crowdsourcing experiments and research with human subjects, does the paper include the full text of instructions given to participants and screenshots, if applicable, as well as details about compensation (if any)?

Answer: [NA]

Justification: There were no human subjects in this work.

Guidelines:

- The answer NA means that the paper does not involve crowdsourcing nor research with human subjects.
- Including this information in the supplemental material is fine, but if the main contribution of the paper involves human subjects, then as much detail as possible should be included in the main paper.
- According to the NeurIPS Code of Ethics, workers involved in data collection, curation, or other labor should be paid at least the minimum wage in the country of the data collector.

### 15. Institutional review board (IRB) approvals or equivalent for research with human subjects

Question: Does the paper describe potential risks incurred by study participants, whether such risks were disclosed to the subjects, and whether Institutional Review Board (IRB) approvals (or an equivalent approval/review based on the requirements of your country or institution) were obtained?

Answer: [NA]

Justification: No human subjects or study participants were used in this research.

Guidelines:

- The answer NA means that the paper does not involve crowdsourcing nor research with human subjects.

- 1518 • Depending on the country in which research is conducted, IRB approval (or equivalent)  
1519 may be required for any human subjects research. If you obtained IRB approval, you  
1520 should clearly state this in the paper.
- 1521 • We recognize that the procedures for this may vary significantly between institutions  
1522 and locations, and we expect authors to adhere to the NeurIPS Code of Ethics and the  
1523 guidelines for their institution.
- 1524 • For initial submissions, do not include any information that would break anonymity (if  
1525 applicable), such as the institution conducting the review.

#### 1526 16. **Declaration of LLM usage**

1527 Question: Does the paper describe the usage of LLMs if it is an important, original, or  
1528 non-standard component of the core methods in this research? Note that if the LLM is used  
1529 only for writing, editing, or formatting purposes and does not impact the core methodology,  
1530 scientific rigorousness, or originality of the research, declaration is not required.

1531 Answer: [NA]

1532 Justification: LLMs were not used in the core methods of this research.

1533 Guidelines:

- 1534 • The answer NA means that the core method development in this research does not  
1535 involve LLMs as any important, original, or non-standard components.
- 1536 • Please refer to our LLM policy (<https://neurips.cc/Conferences/2025/LLM>)  
1537 for what should or should not be described.
